# Supplementary material for: A polyamine dendritic polymer–copper complex: a reusable catalyst for the additive-free amination of aryl bromides, and iodides
Source: Royal Society of Chemistry journal article supplement (doi:10.1039/c9nj04981a), 2019-12-17

# New Journal of Chemistry

Supporting Information for

## Polyamine Dendritic Polymer–Copper Complex: A Reusable Catalyst for Additive-Free Amination of Aryl Bromides, and Iodides

Avudaiappan G., Palmurukan M. R., Unnikrishnan V., Sreekumar K.\*

Department of Applied Chemistry, Cochin University of Science and Technology,

Kochi-682022, Kerala, India. Email: [ksk@cusat.ac.in](mailto:ksk@cusat.ac.in)

### Abstract

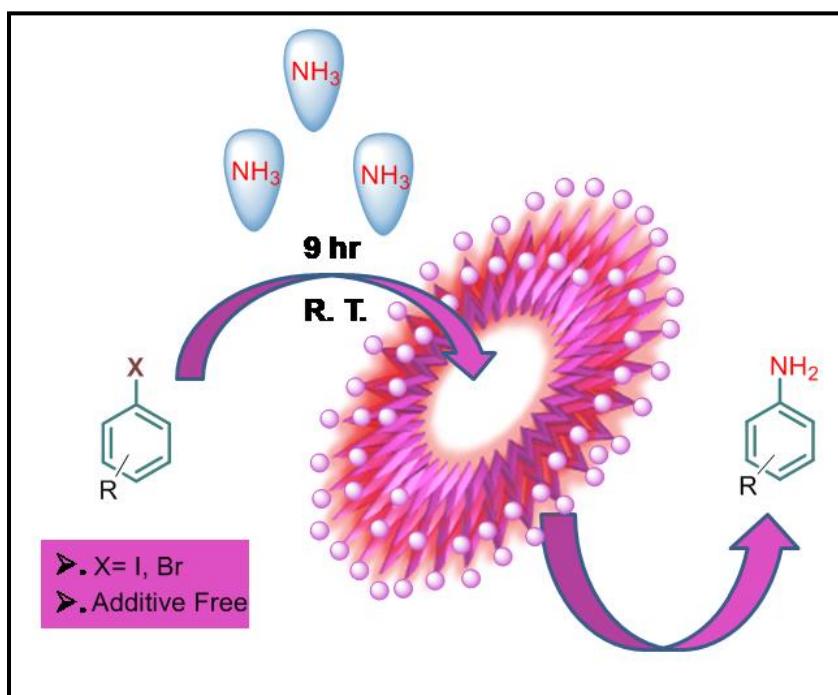

| <b>Figure No.</b> | <b>Content</b>                                                   | <b>Page No.</b> |
|-------------------|------------------------------------------------------------------|-----------------|
| S1                | Scheme for the synthesis of PPECH-Amine-Cu                       | 3               |
| S2                | FT-IR spectrum and GPC Report of POR-PECH                        | 5               |
| S3                | FT-IR spectrum of PPECH-Amine                                    | 7               |
| S4                | $^1\text{H}$ and $^{13}\text{C}$ NMR spectrum of PPECH-Amine     | 8               |
| S5                | GPC Report of POR-PECH-amine                                     | 9               |
| S6                | FE- SEM image of PPECH-Amine                                     | 10              |
| S7                | UV-Vis spectrum of PPECH-Amine & spectrum of PPECH-Amine-Cu      | 11              |
| S8                | $^1\text{H}$ NMR spectrum of PPECH-Amine-Cu                      | 12              |
| S9                | $^{13}\text{C}$ NMR and DEPT-135 spectrum of PPECH-Amine-Cu      | 13              |
| S10               | TG-DTA Trace of PPECH-Amine- Cu                                  | 14              |
| S11               | PXRD image of PPECH-Amine- Cu                                    | 15              |
| S12               | FE- SEM image of PPECH-Amine- Cu                                 | 15              |
| S13               | HR-TEM image of PPECH-Amine- Cu                                  | 16              |
| S14               | XPS Spectra of PPECH-Amine- Cu                                   | 17              |
| S15               | EDX image of PPECH-Amine- Cu                                     | 18              |
| S16               | $^1\text{H}$ and $^{13}\text{C}$ NMR of selected Aromatic amines | 19              |

### S1. Scheme for the synthesis of PPECH-Amine-Cu

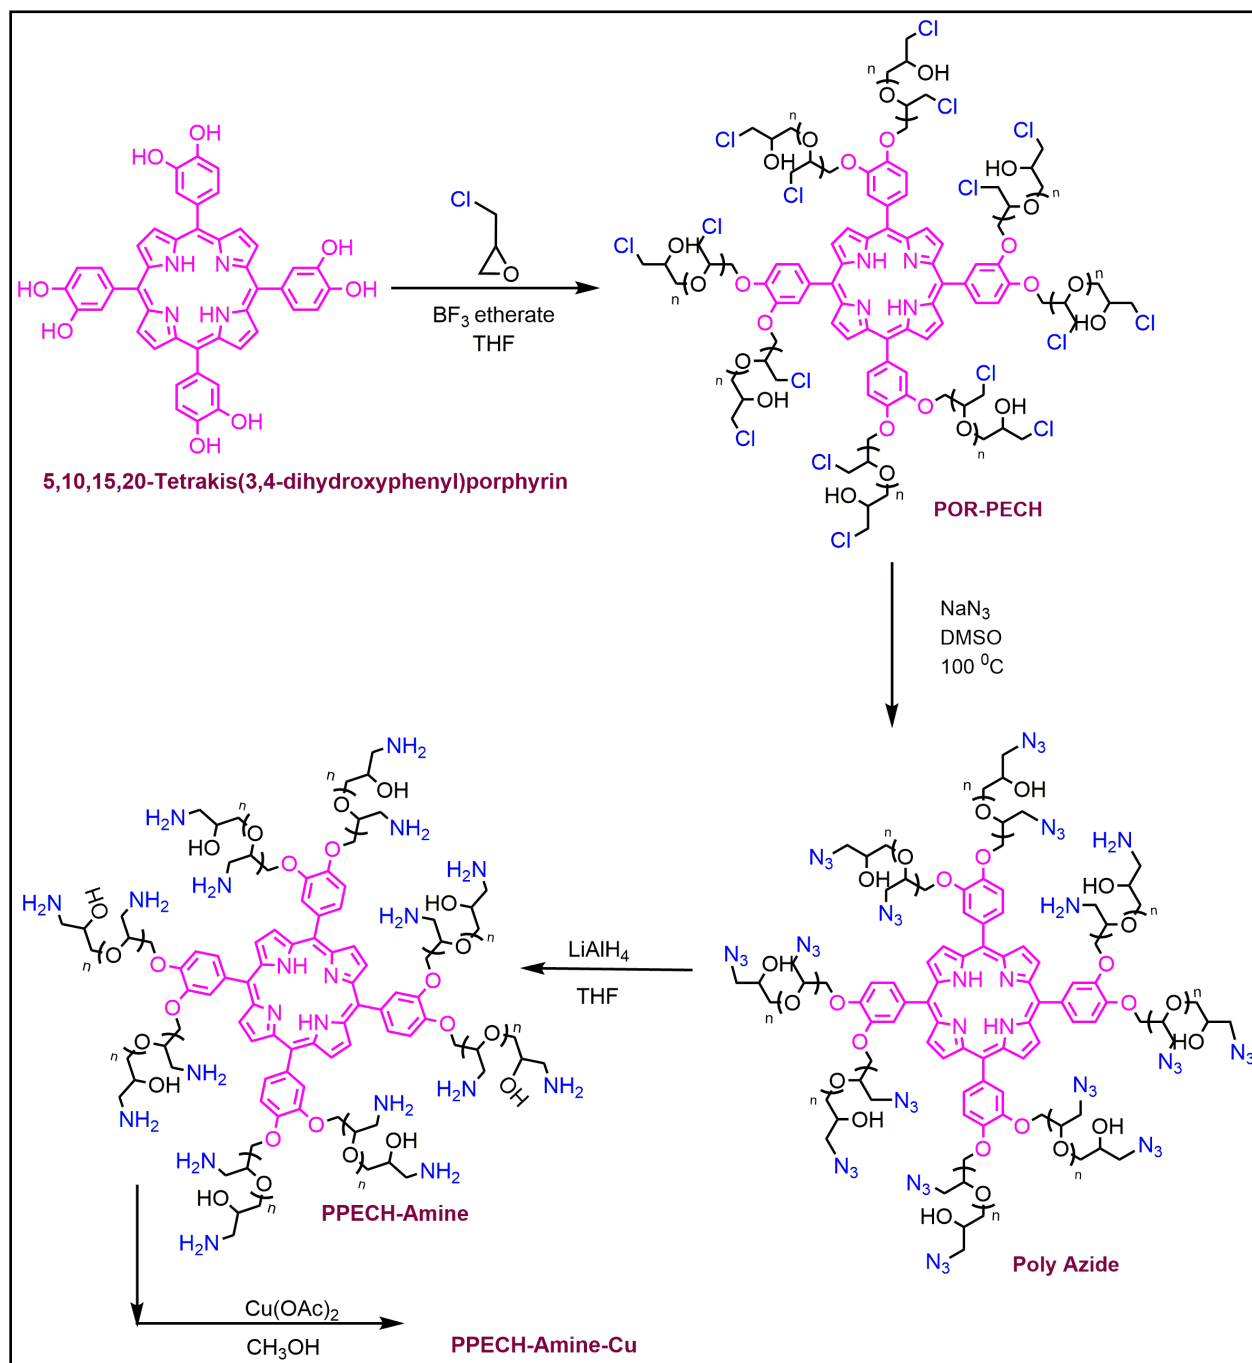

### Structure of PPECH-Amine-Cu

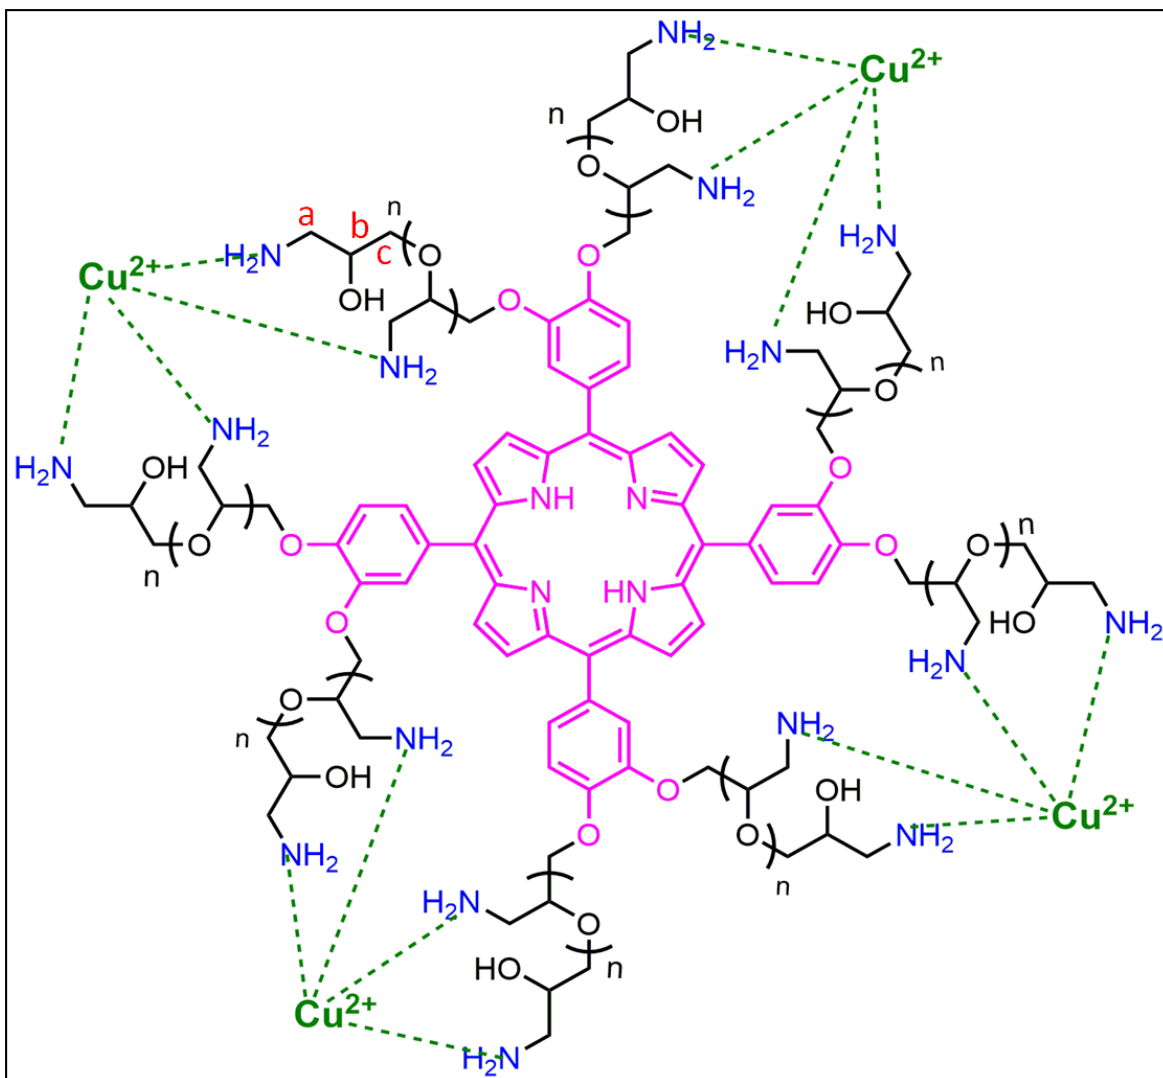

## S2. FT-IR spectrum and GPC Report of POR-PECH

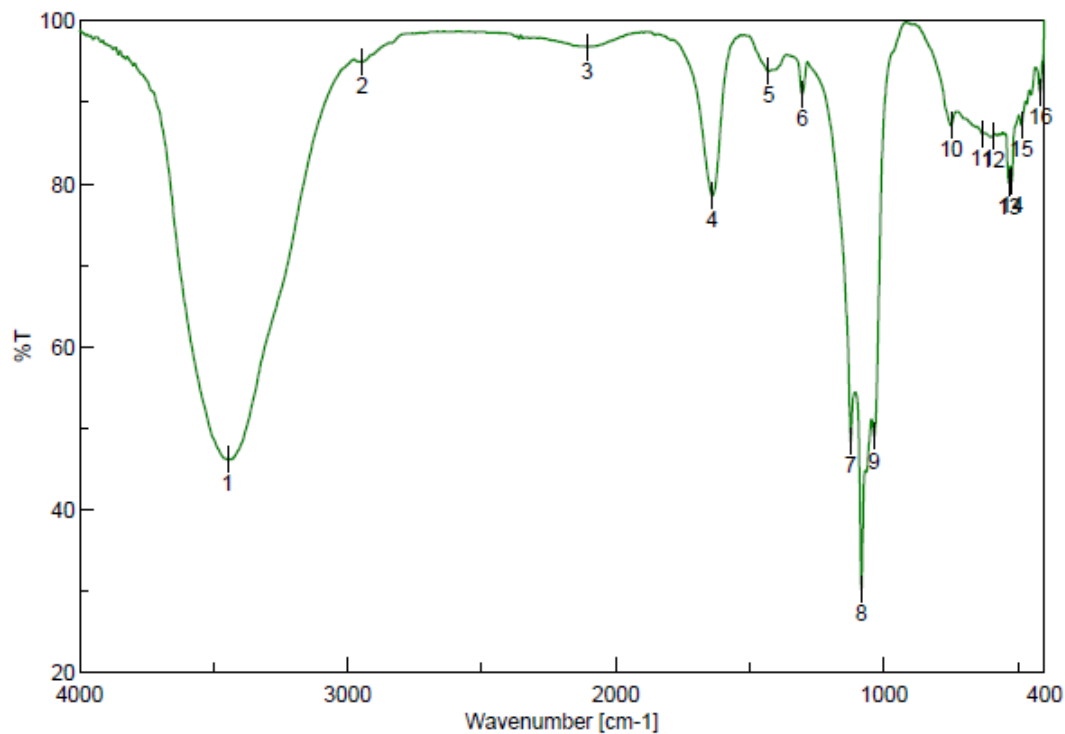

### Result of Peak Picking

| No. | Position | Intensity | No. | Position | Intensity |
|-----|----------|-----------|-----|----------|-----------|
| 1   | 3448.1   | 46.0408   | 2   | 2946.7   | 94.9201   |
| 3   | 2106.85  | 96.787    | 4   | 1639.2   | 78.4645   |
| 5   | 1428.99  | 93.7592   | 6   | 1304.61  | 90.9546   |
| 7   | 1123.33  | 48.3097   | 8   | 1082.83  | 30.0692   |
| 9   | 1035.59  | 48.8874   | 10  | 749.209  | 87.0822   |
| 11  | 633.501  | 86.0612   | 12  | 592.039  | 85.8604   |
| 13  | 533.221  | 80.0705   | 14  | 522.615  | 80.2824   |
| 15  | 486.938  | 87.1023   | 16  | 416.549  | 91.2245   |

### [Comment]

Sample Name  
 Comment  
 User  
 Division  
 Company inst

### [Measurement Information]

Model Name FT/IR-4100typeA  
 Serial Number B053361016

Light Source Standard  
 Detector TGS  
 Accumulation 60  
 Resolution 4 cm-1  
 Zero Filling On  
 Apodization Cosine  
 Gain Auto (8)  
 Aperture Auto (7.1 mm)  
 Scanning Speed Auto (2 mm/sec)  
 Filter Auto (30000 Hz)

## ==== Shimadzu LabSolutions GPC Analysis Report ====

Acquired by : System Administrator  
 Sample Name : por-pech  
 Sample ID : POR-PECH  
 Tray# : 1  
 Vial# : 42  
 Injection Volume : 10 uL  
 Data Filename : AVP1  
 Method Filename : GPC Polystyrene 07022018 C.lcm  
 Batch Filename : QUE.lcb  
 Report Filename : DEFAULT1sr  
 Date Acquired : 3/5/2019 8:01:55 PM  
 Date Processed : 7/2/2019 4:04:28 PM

### Chromatogram & Calibration Curve

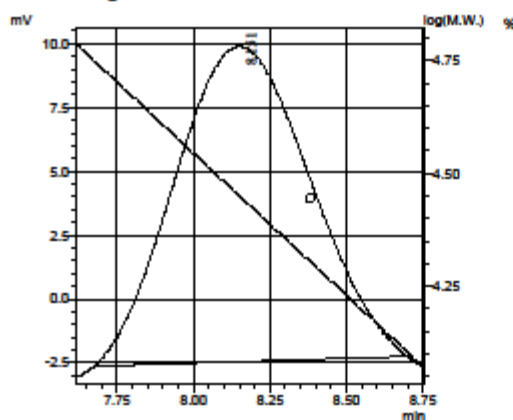

### Molecular Weight Distribution Curve

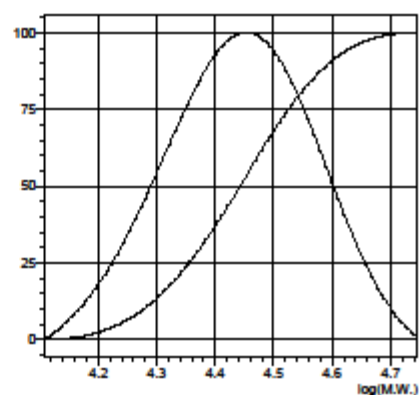

### GPC Calculation Results

#### Peak#:1 (Detector B Channel 1)

##### [Peak Information]

|       | Time(min) | Volume(mL) | Molecular Weight | Height |
|-------|-----------|------------|------------------|--------|
| Start | 8.625     | 8.625      | 14173            | 7989   |
| Top   | 9.000     | 9.000      | 8236             | 1331   |
| End   | 9.250     | 9.250      | 5733             | 7618   |

Area : 24557

Area% : 100.0000

##### [Average Molecular Weight]

|                                     |         |
|-------------------------------------|---------|
| Number Average Molecular Weight(Mn) | 8288    |
| Weight Average Molecular Weight(Mw) | 8572    |
| Z Average Molecular Weight(Mz)      | 8885    |
| Z+1 Average Molecular Weight(Mz1)   | 9224    |
| Mw/Mn                               | 1.03423 |
| Mv/Mn                               | 0.00000 |
| Mz/Mw                               | 1.03655 |

#### Detector B Channel 1

##### [Average Molecular Weight(Total)]

|                                     |         |
|-------------------------------------|---------|
| Number Average Molecular Weight(Mn) | 8288    |
| Weight Average Molecular Weight(Mw) | 8572    |
| Z Average Molecular Weight(Mz)      | 8885    |
| Z+1 Average Molecular Weight(Mz1)   | 9224    |
| Mw/Mn                               | 1.03423 |
| Mv/Mn                               | 0.00000 |
| Mz/Mw                               | 1.03655 |

E:\Data\2019\MARCH\WOT1.lcd

S3. FT-IR spectrum of PPECH-Amine and PPECH-Amine-Cu

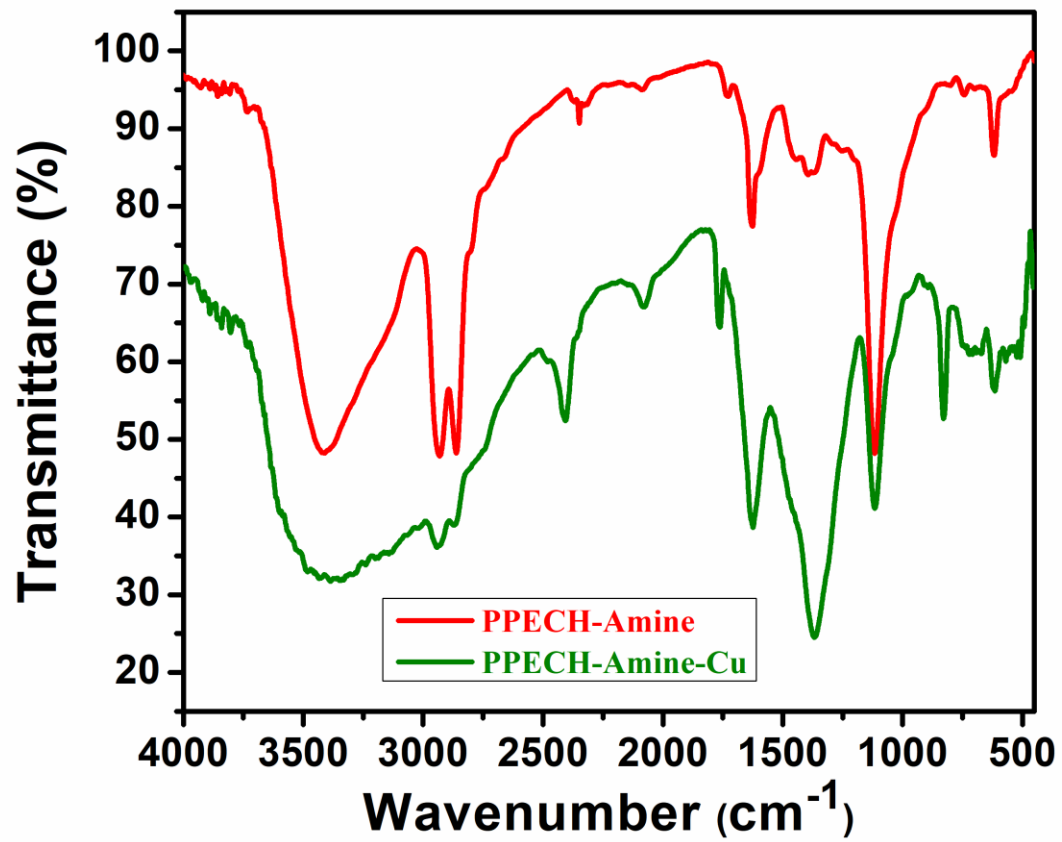

### S4. $^1\text{H}$ and $^{13}\text{C}$ NMR spectrum of PPECH-Amine

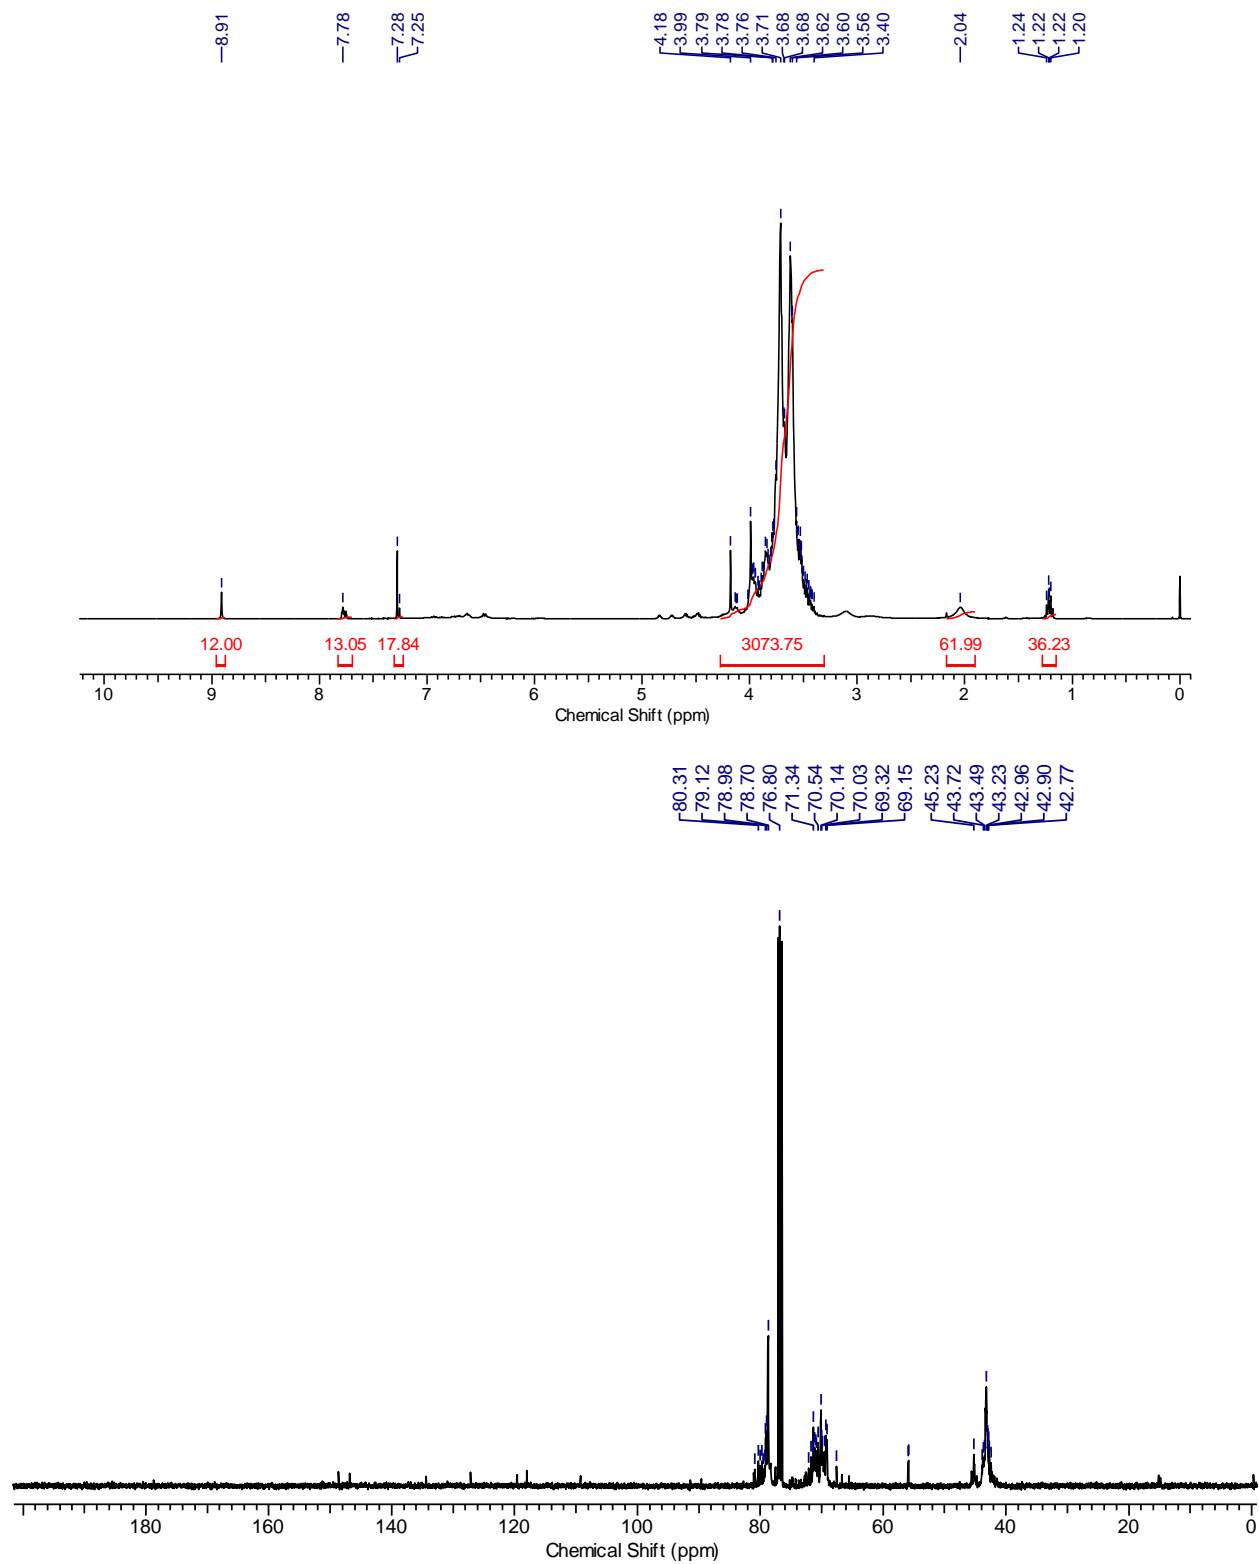



## S5. GPC Report of POR-PECH-amine

8/19/2019 6:13:20 PM 1 / 1

### ==== Shimadzu LabSolutions GPC Analysis Report ====

```

Acquired by       : System Administrator
Sample Name      : POR-PECH-AMINE
Sample ID       : POR-PECH-AMINE
Tray#          : 1
Vial#         : 14
Injection Volume : 20 uL
Data Filename   : A4.lcd
Method Filename : GPC Polystyrene 07022018 C.lcm
Batch Filename  : LC_07022018/CL.lcb
Report Filename : DEFAULT.lsr
Date Acquired   : 2/8/2018 1:29:58 PM
Date Processed  : 2/8/2018 2:36:32 PM
    
```

**Chromatogram & Calibration Curve**

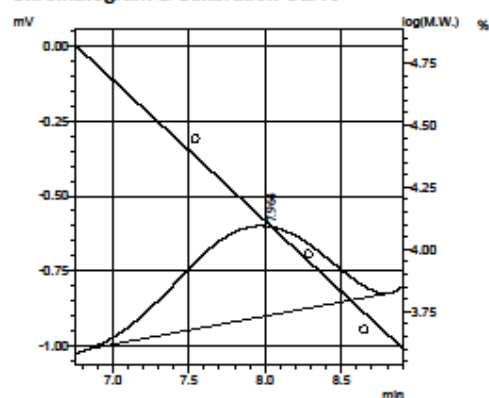

**Molecular Weight Distribution Curve**

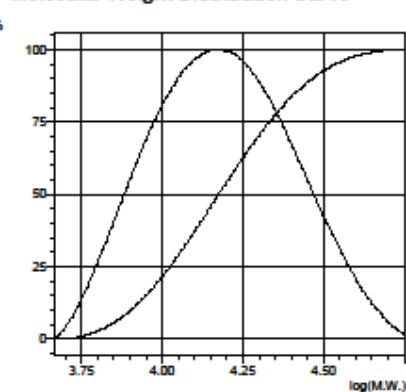

**GPC Calculation Results**

Peak# 1 (Detector B Channel 1)

[Peak Information]

|       | Time(min) | Volume(mL) | Molecular Weight | Height |
|-------|-----------|------------|------------------|--------|
| Start | 6.867     | 6.867      | 57434            | -1009  |
| Top   | 7.964     | 7.964      | 13650            | 306    |
| End   | 8.800     | 8.800      | 4569             | -827   |

Area : 19086

Area% : 100.0000

[Average Molecular Weight]

|                                     |         |
|-------------------------------------|---------|
| Number Average Molecular Weight(Mn) | 13648   |
| Weight Average Molecular Weight(Mw) | 17260   |
| Z Average Molecular Weight(Mz)      | 21724   |
| Z+1 Average Molecular Weight(Mz1)   | 26495   |
| Mw/Mn                               | 1.26461 |
| Mv/Mn                               | 0.00000 |
| Mz/Mw                               | 1.25866 |

Detector B Channel 1

[Average Molecular Weight(Total)]

|                                     |         |
|-------------------------------------|---------|
| Number Average Molecular Weight(Mn) | 13648   |
| Weight Average Molecular Weight(Mw) | 17260   |
| Z Average Molecular Weight(Mz)      | 21724   |
| Z+1 Average Molecular Weight(Mz1)   | 26495   |
| Mw/Mn                               | 1.26461 |
| Mv/Mn                               | 0.00000 |
| Mz/Mw                               | 1.25866 |

E:\Data\2018\Feb\08\A4.lcd

**S6. FE- SEM image of PPECH-amine**

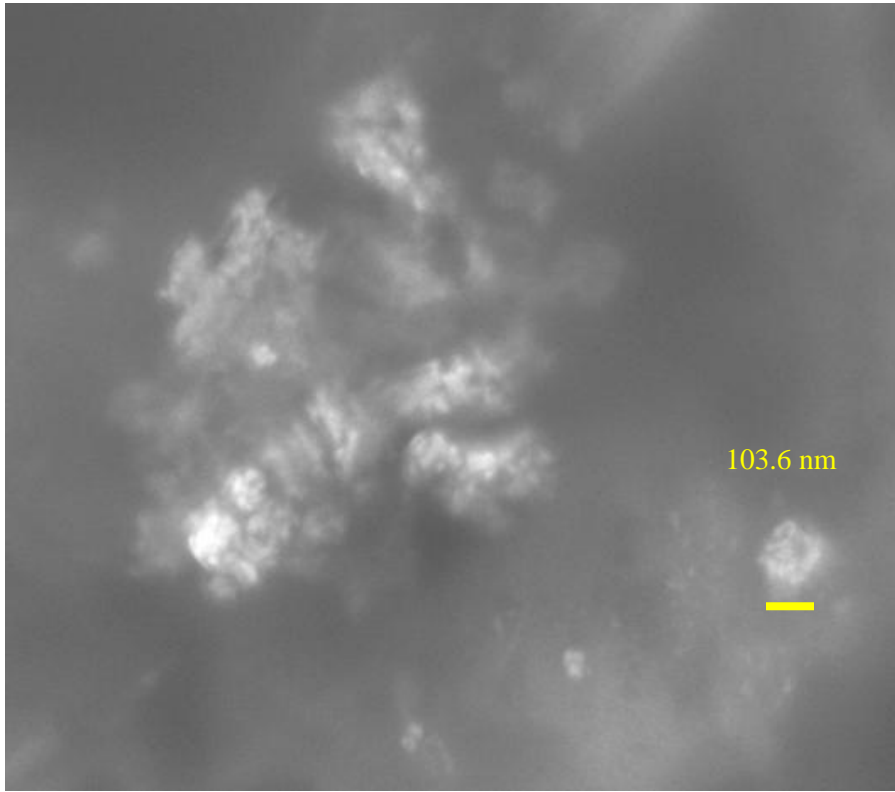

**S7. UV-Vis spectrum of PPECH-Amine & spectrum of PPECH-Amine-Cu**

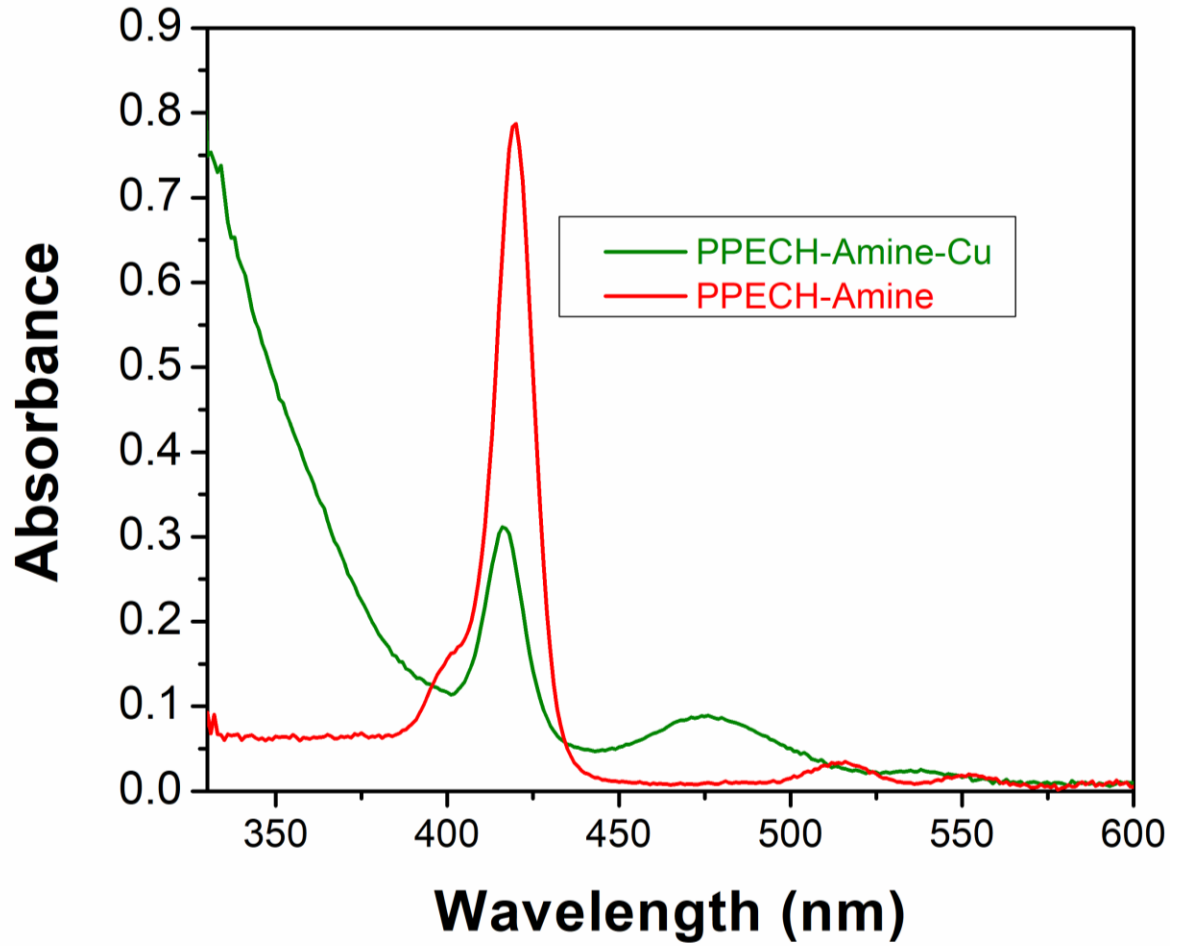

### S8. $^1\text{H}$ NMR spectrum of PPECH-Amine- Cu

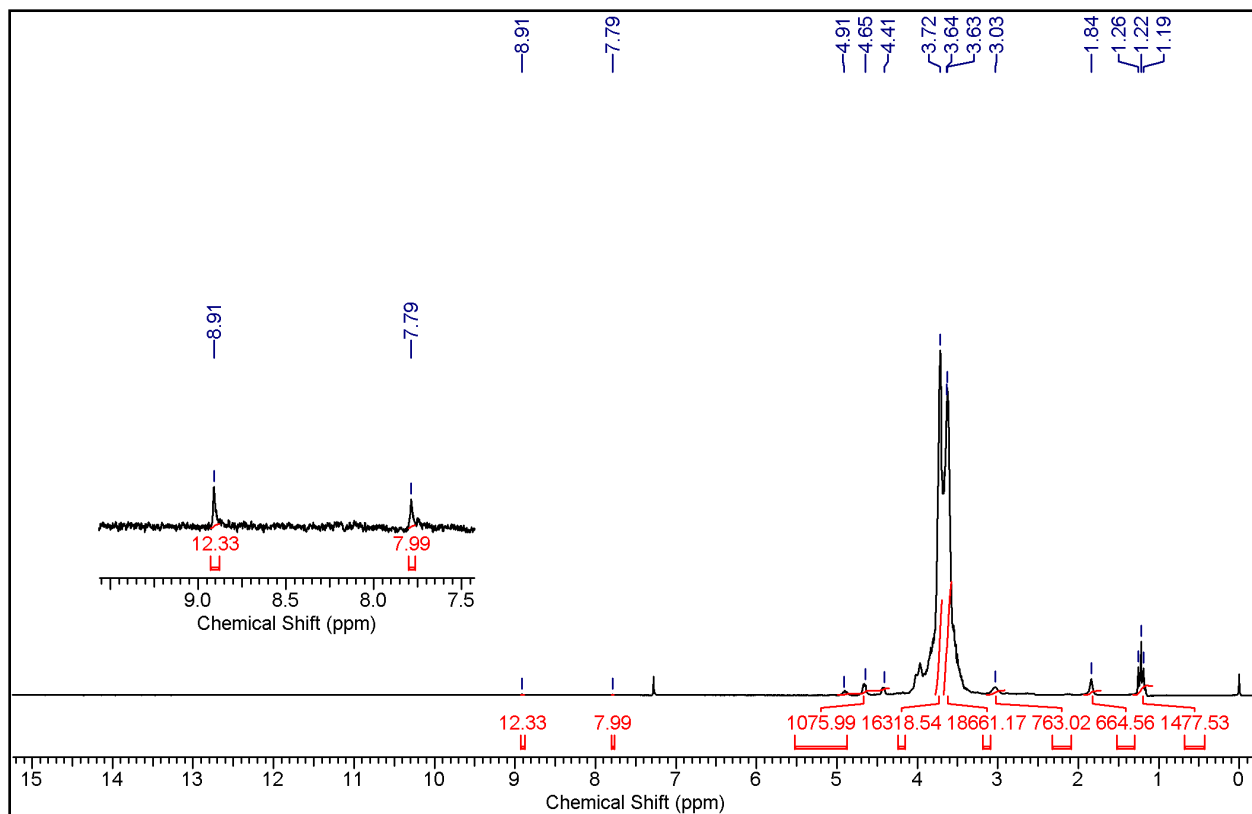

### S9A. <sup>13</sup>C NMR spectrum of PPECH-Amine- Cu

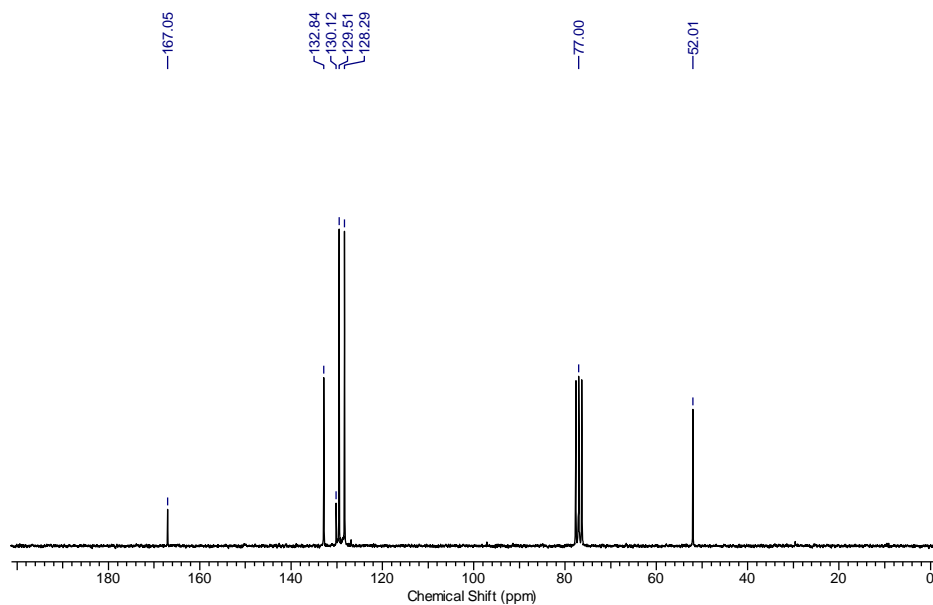

The NOE quench effect of paramagnetic species resulting in partial <sup>13</sup>C NMR signals were not observable.

### S9B. DEPT-135 spectrum of PPECH-Amine- Cu

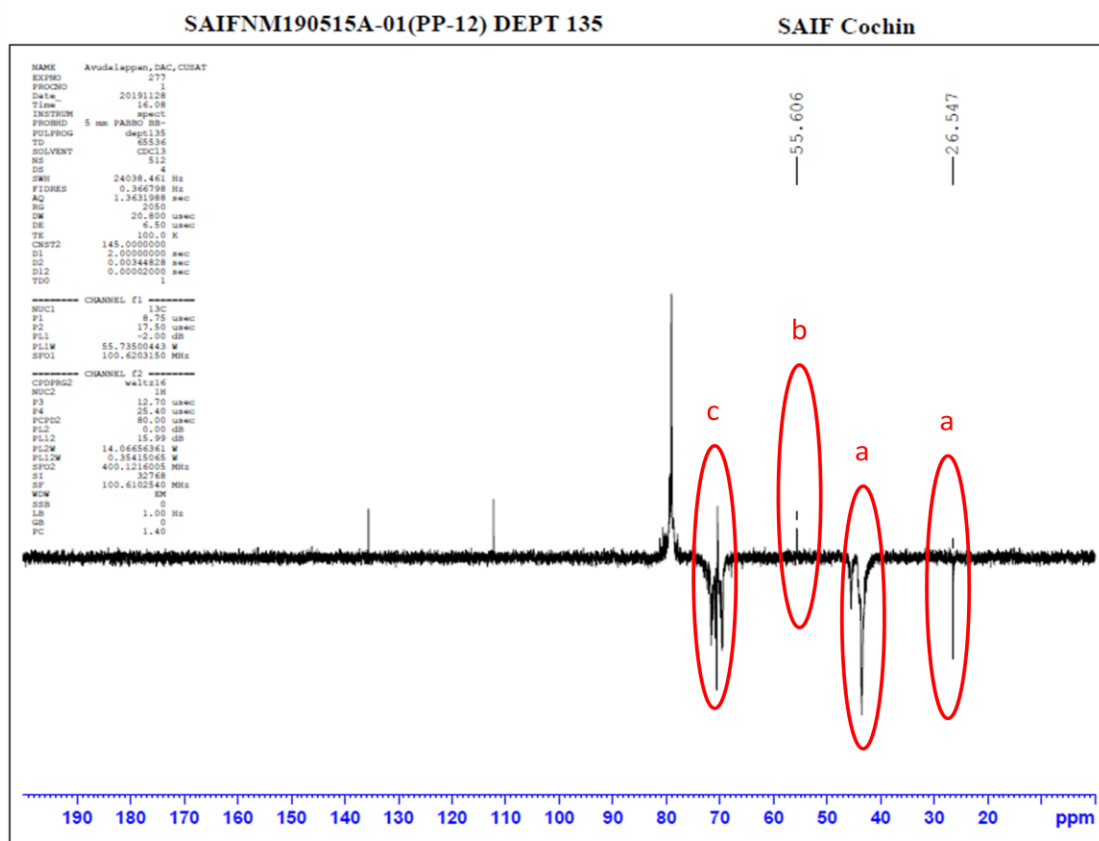

S10. TG-DTA Trace of PBCMO-amine-Cu

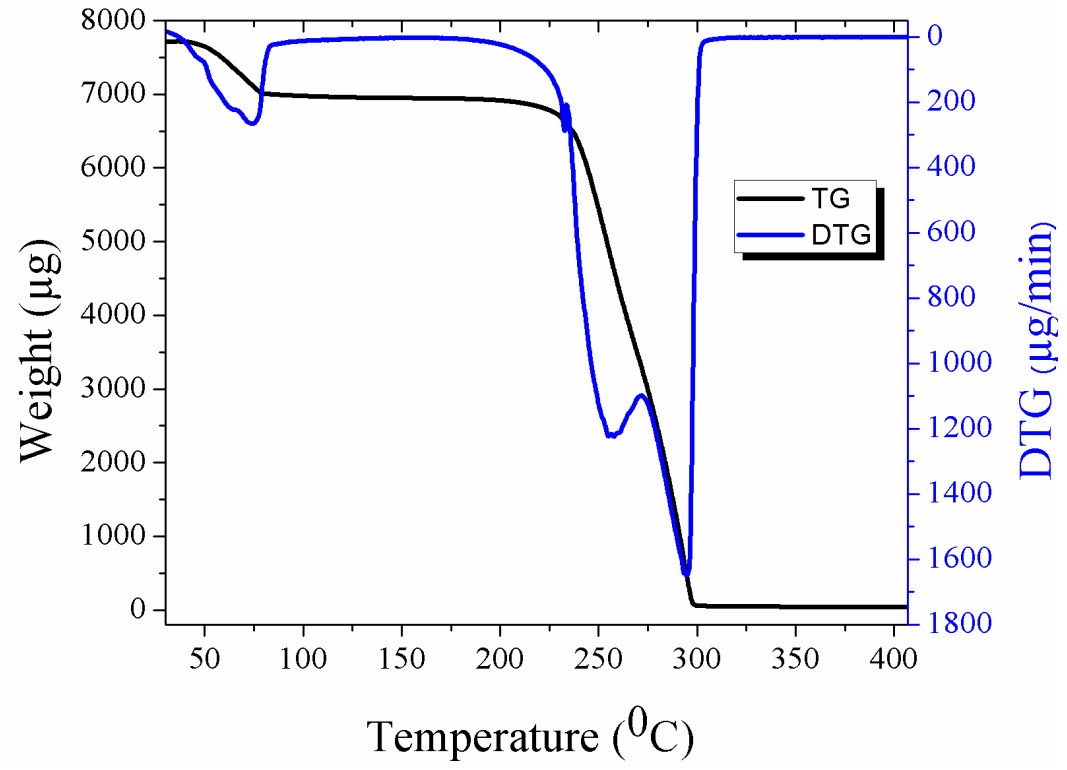

**S11. PXRD image of PBCMO-amine-Cu**

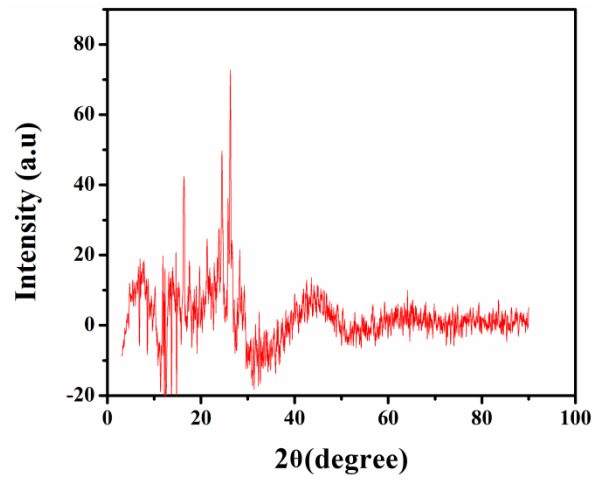

**S12. FE- SEM image of POR-PBCMO-amine-Cu**

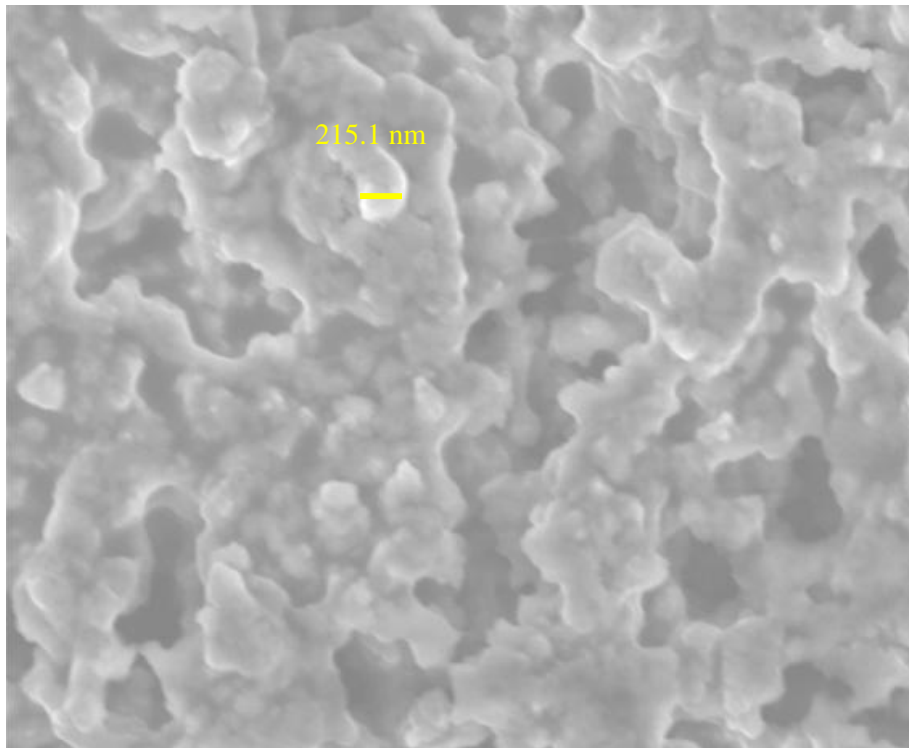

**S13. HR-TEM image of PPECH-Amine- Cu**

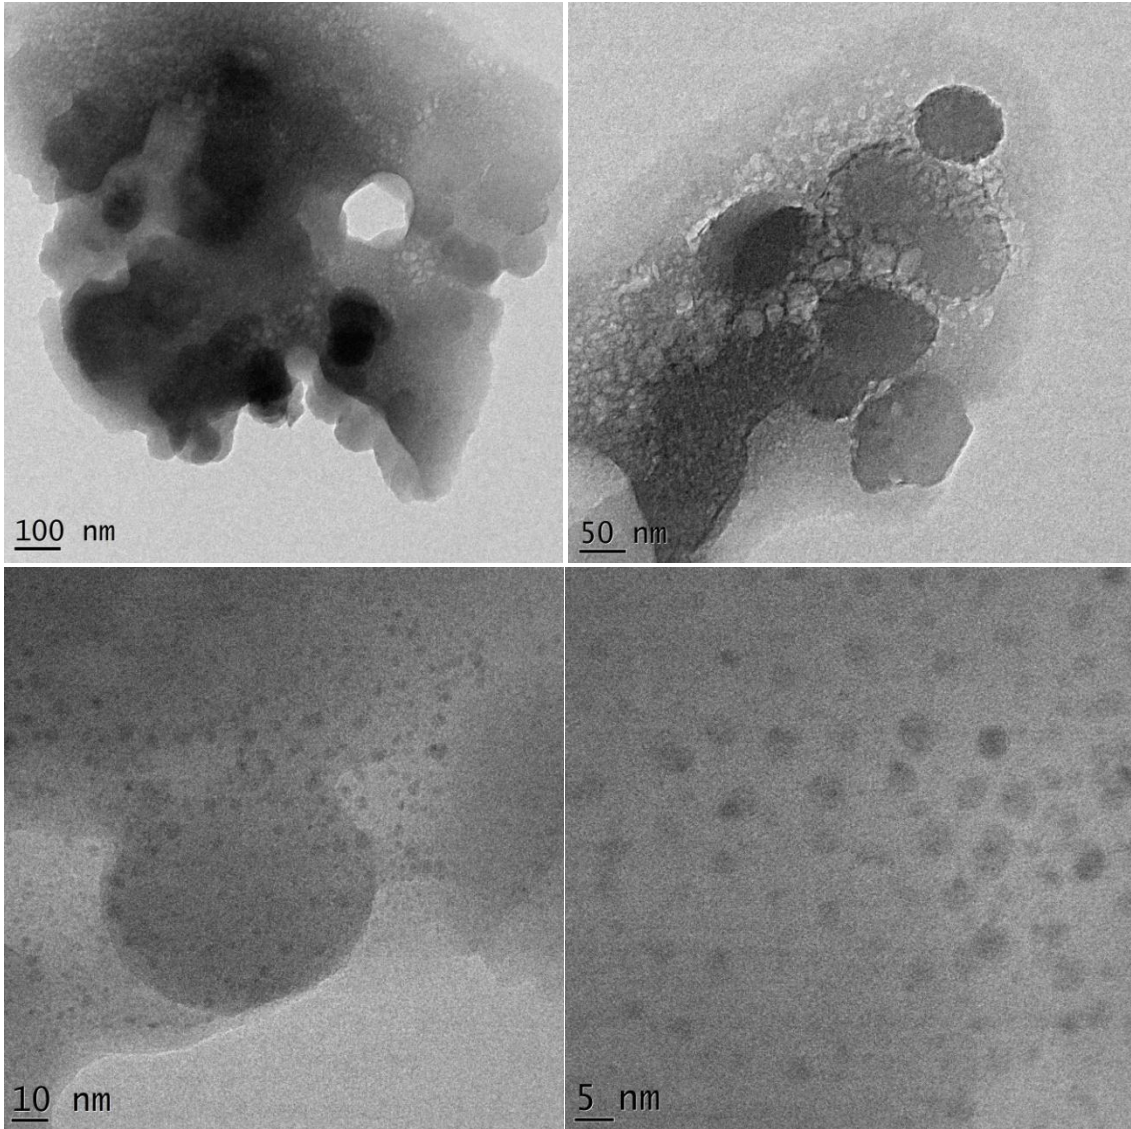



### S14. XPS Spectra of PPECH-Amine- Cu

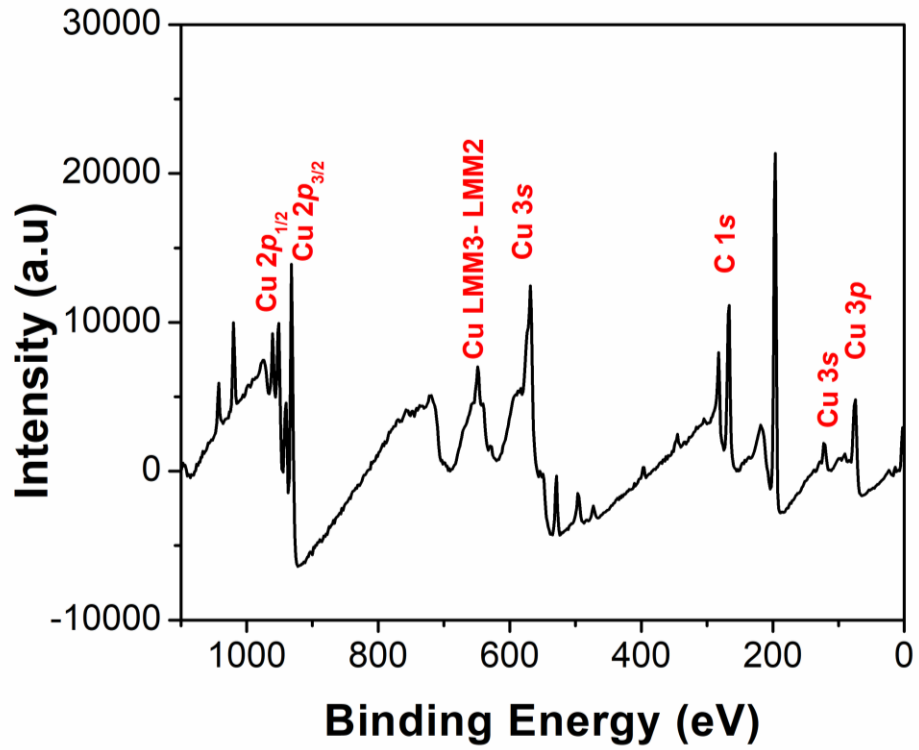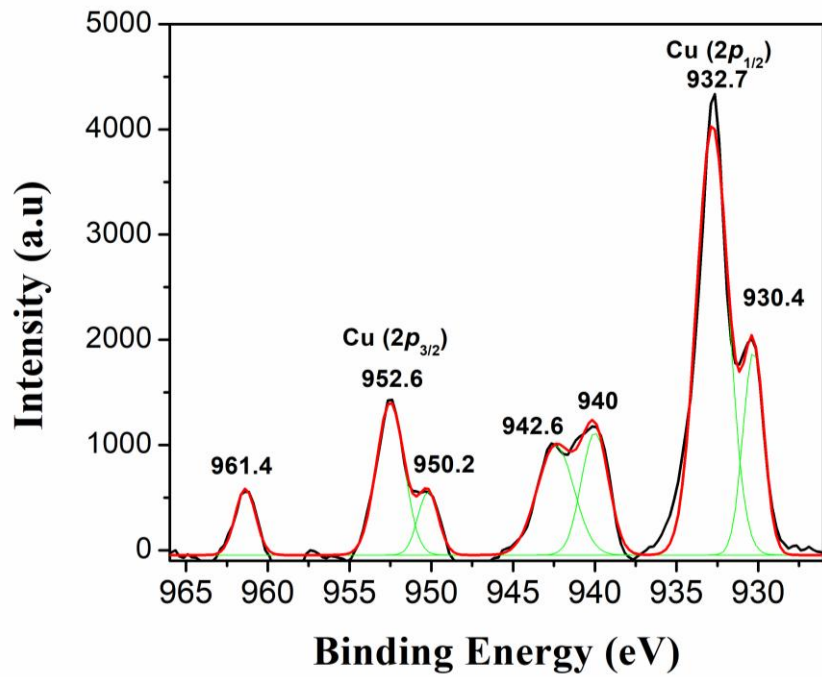

### S15. EDX image of PPECH-Amine- Cu

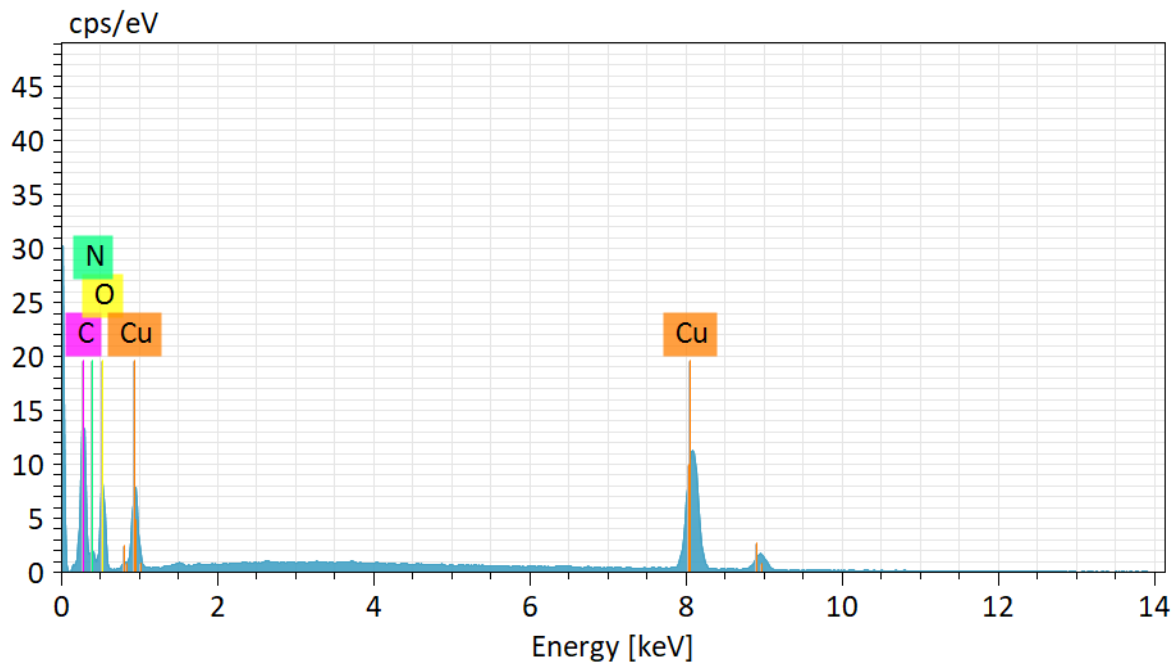

5 1

| Element  | At. No. | Netto      | Mass [%]     | Mass Norm. [%] | Atom [%]      | abs. error [%]<br>(1 sigma) | rel. error [%]<br>(1 sigma) |
|----------|---------|------------|--------------|----------------|---------------|-----------------------------|-----------------------------|
| Carbon   | 6       | 16673      | 9.42         | 34.88          | 52.19         | 1.26                        | 13.36                       |
| Oxygen   | 8       | 11370      | 5.56         | 20.59          | 23.13         | 0.79                        | 14.20                       |
| Copper   | 29      | 29316      | 8.76         | 32.46          | 9.18          | 0.27                        | 3.04                        |
| Nitrogen | 7       | 2847       | 3.26         | 12.07          | 15.49         | 0.60                        | 18.26                       |
|          |         | <b>Sum</b> | <b>27.00</b> | <b>100.00</b>  | <b>100.00</b> |                             |                             |

# S16. $^1\text{H}$ and $^{13}\text{C}$ NMR of selected Aromatic amines

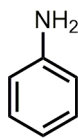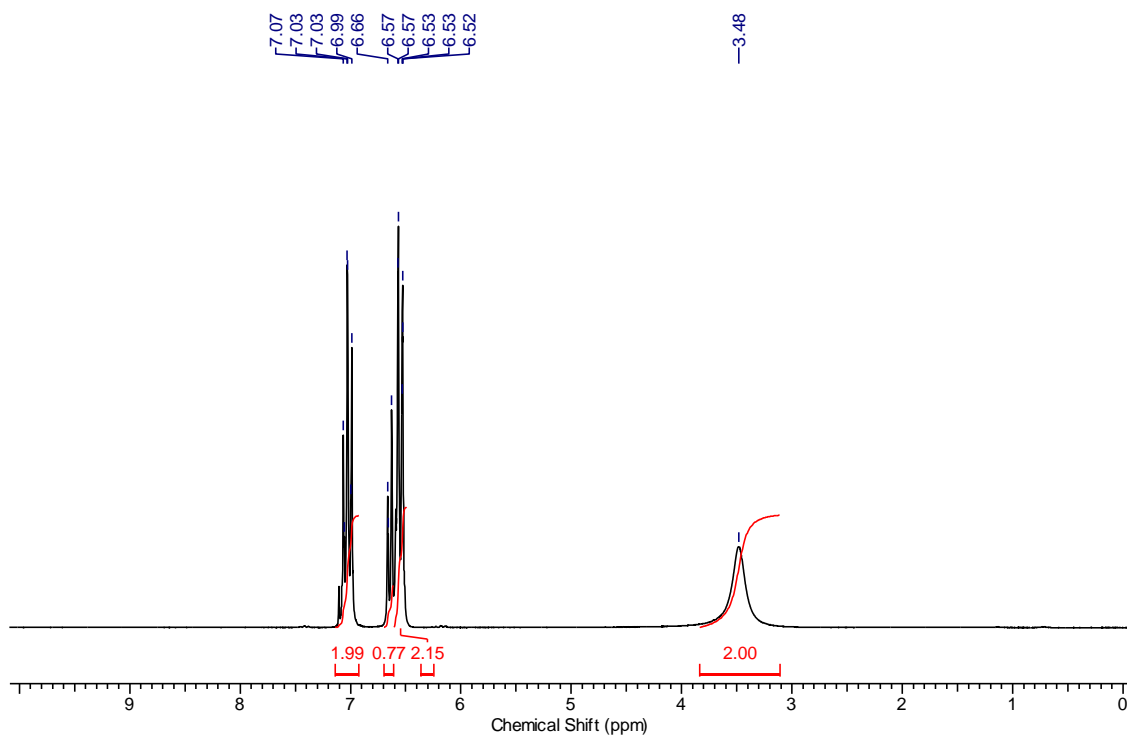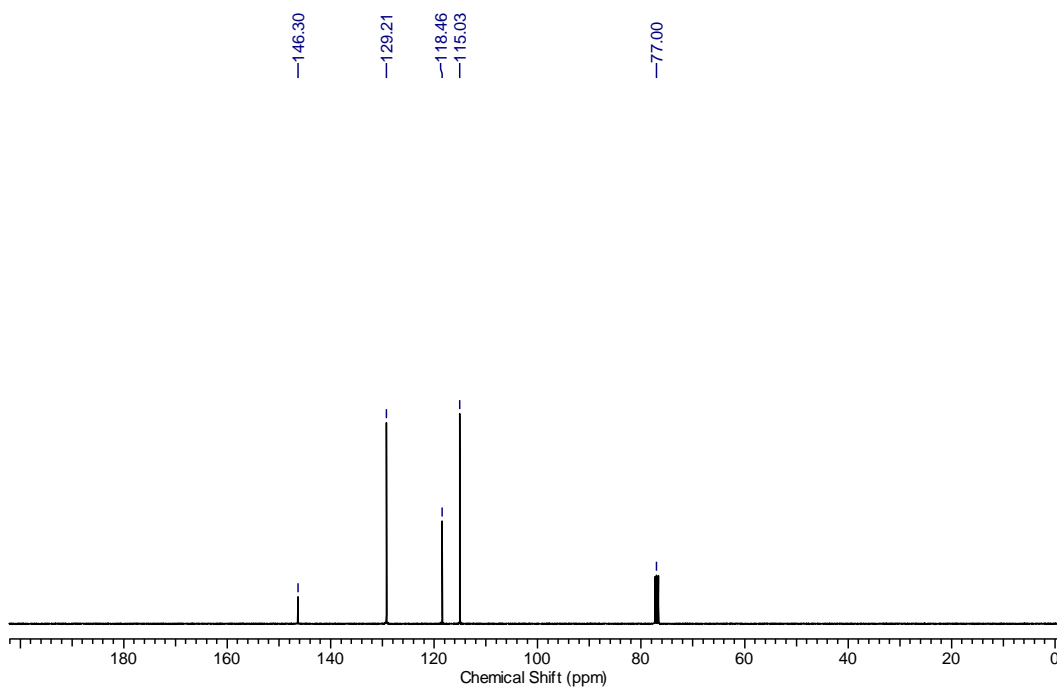

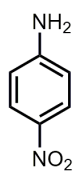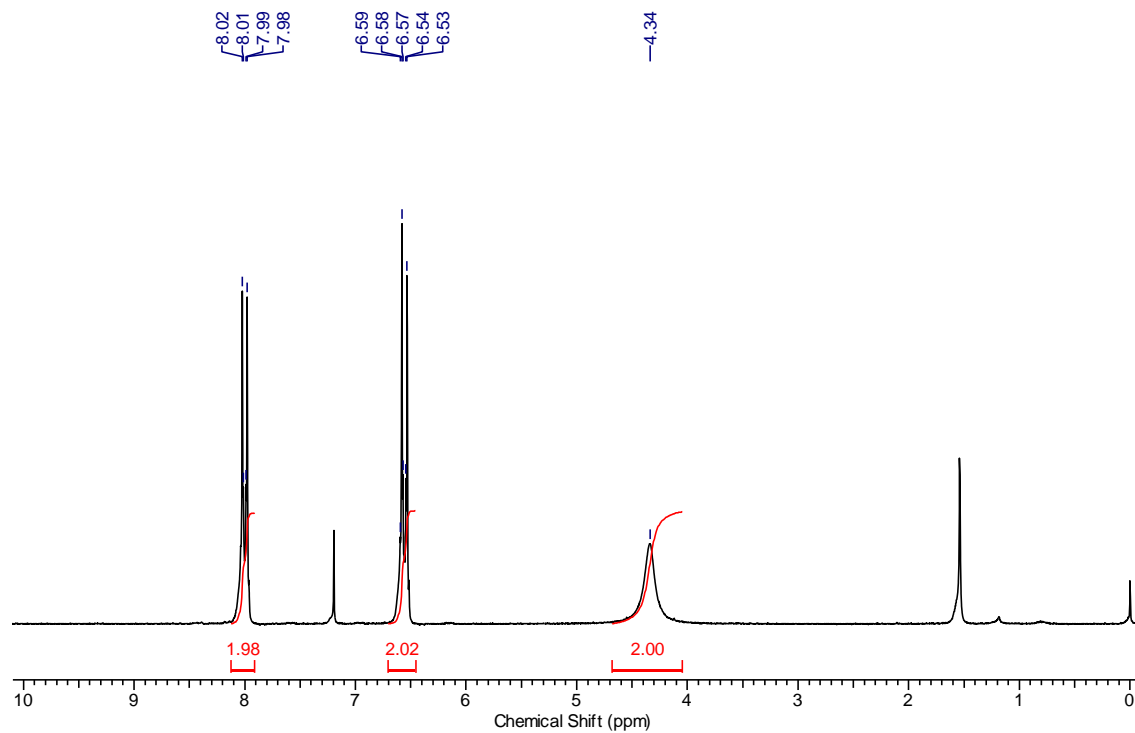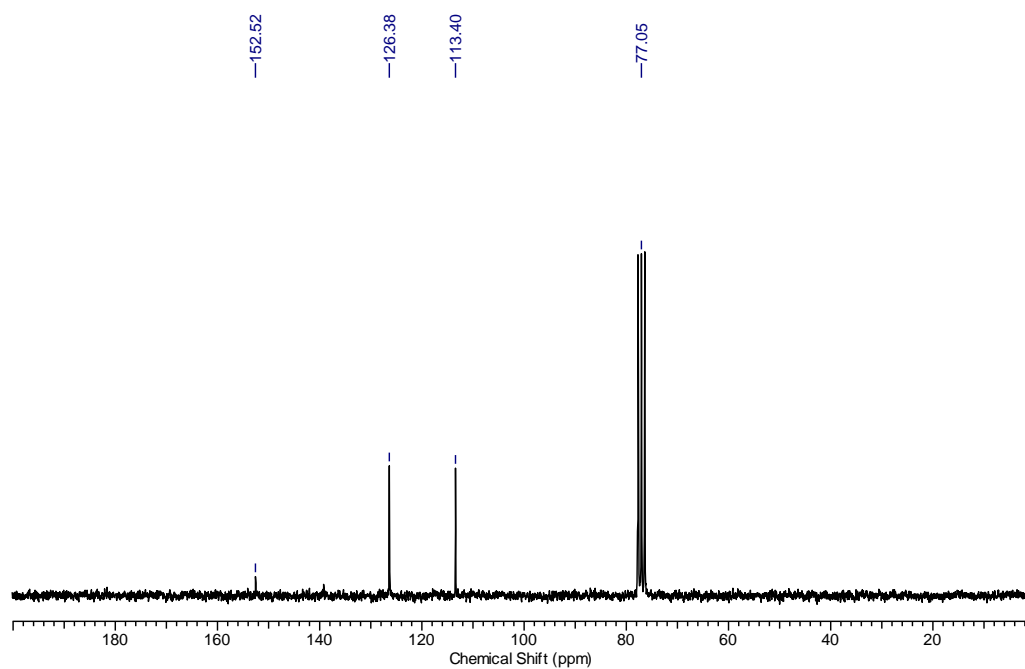

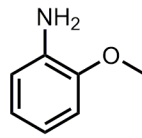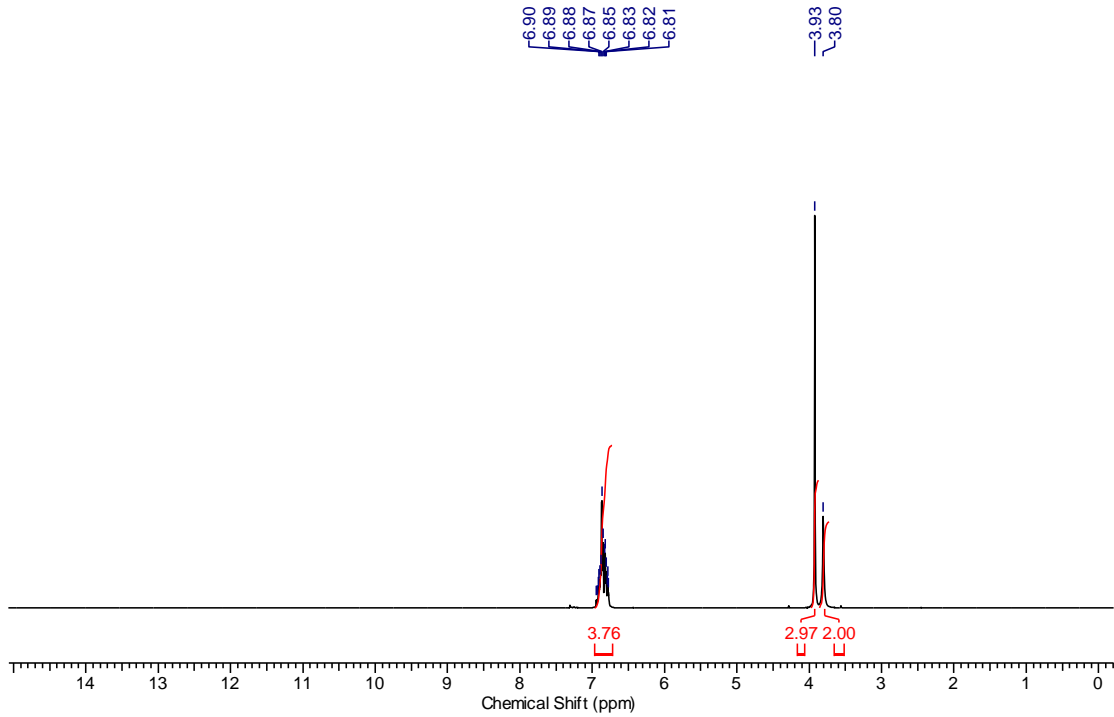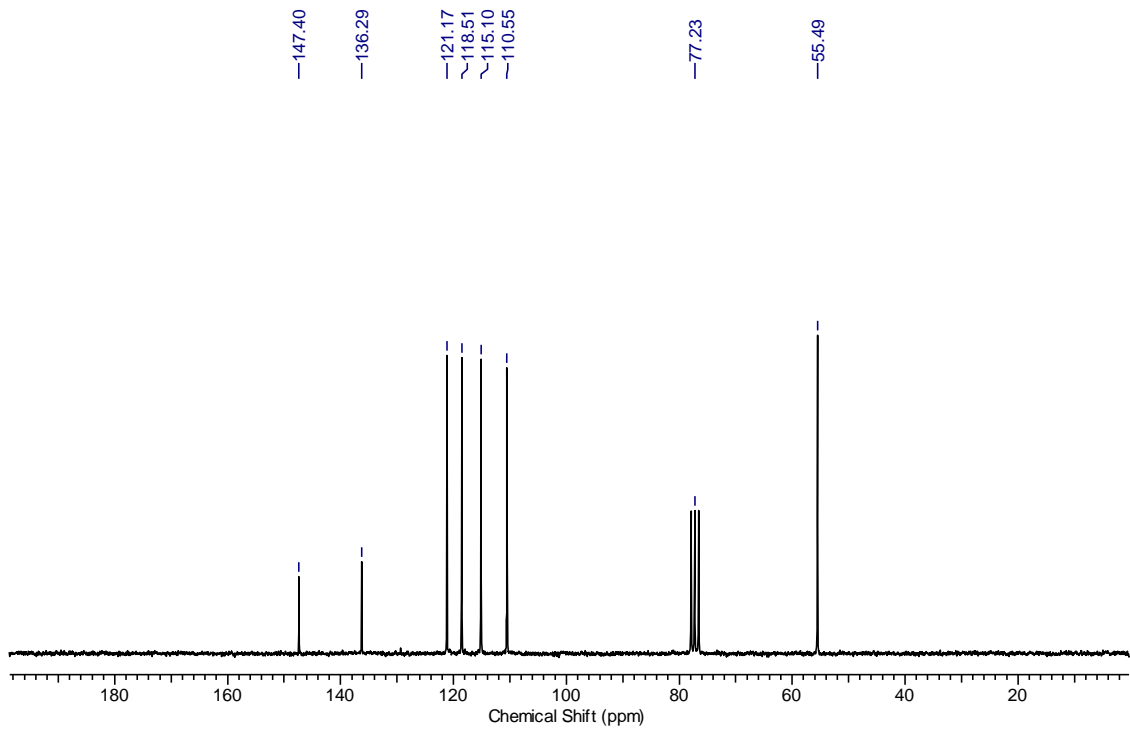

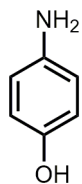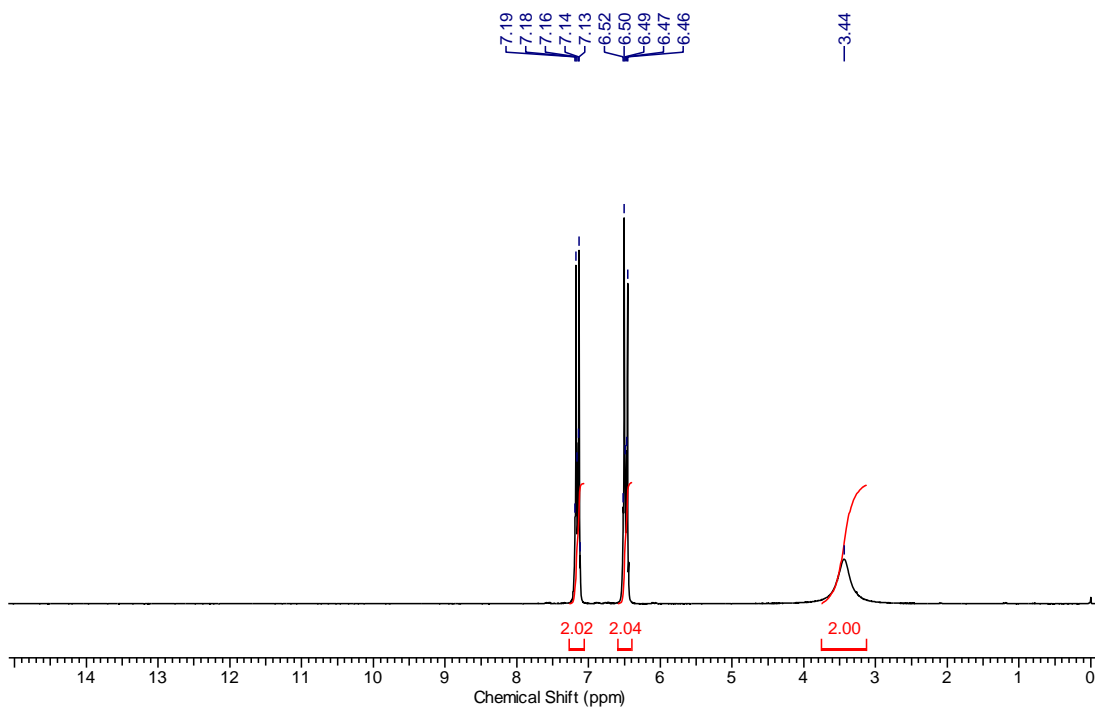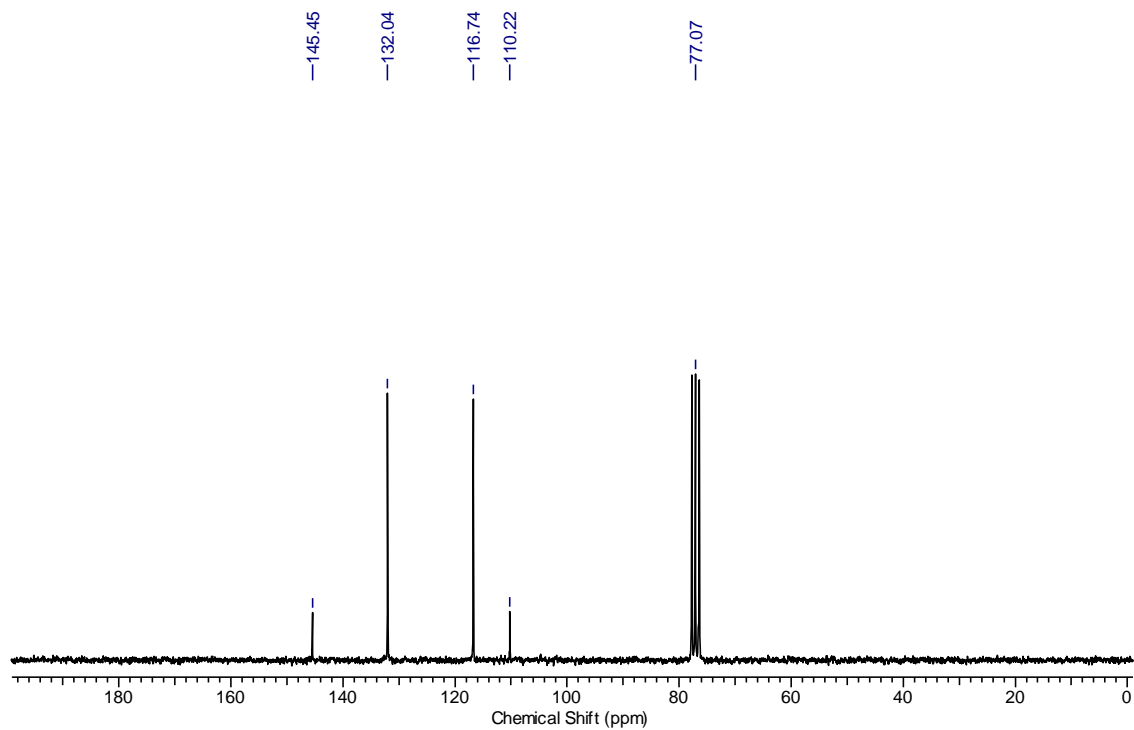

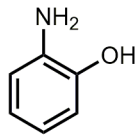

7.15  
7.11  
7.07  
6.79  
6.78  
6.75  
6.72  
6.71  
6.70  
6.57

—3.77

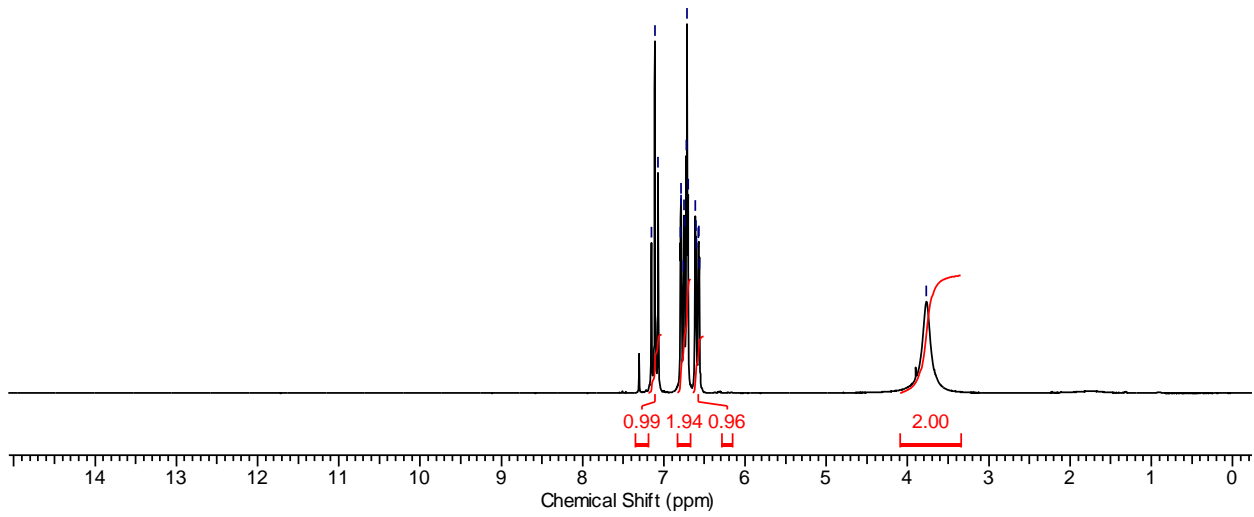

144.18  
136.61  
119.77  
116.79  
114.75  
114.59

—39.51

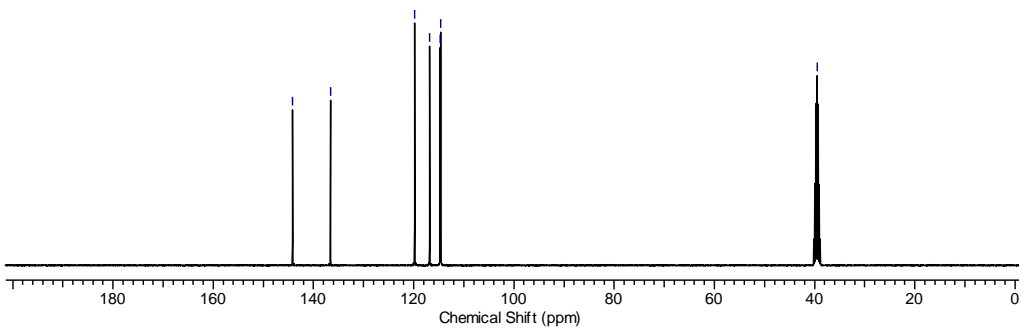

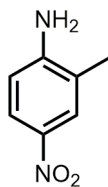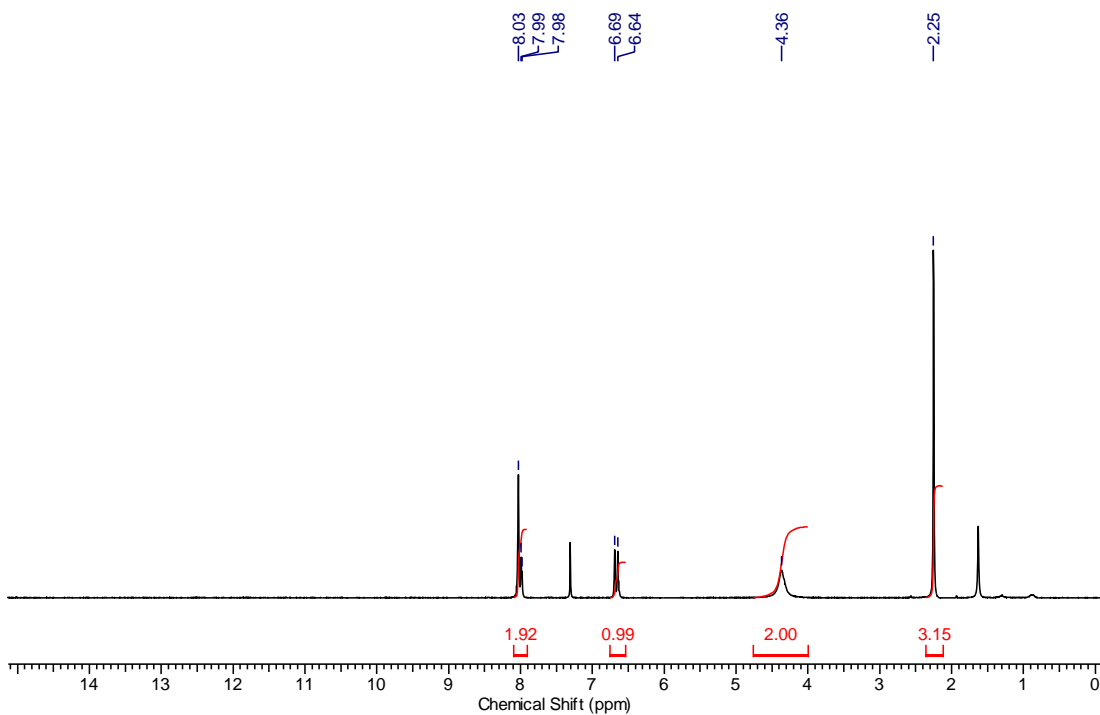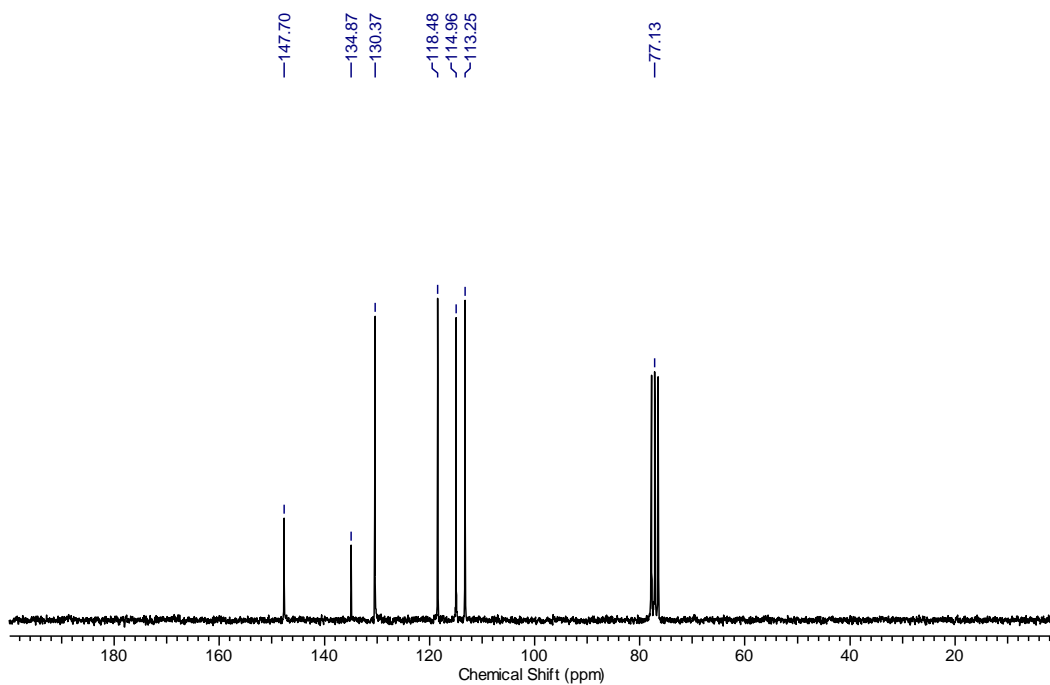



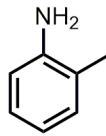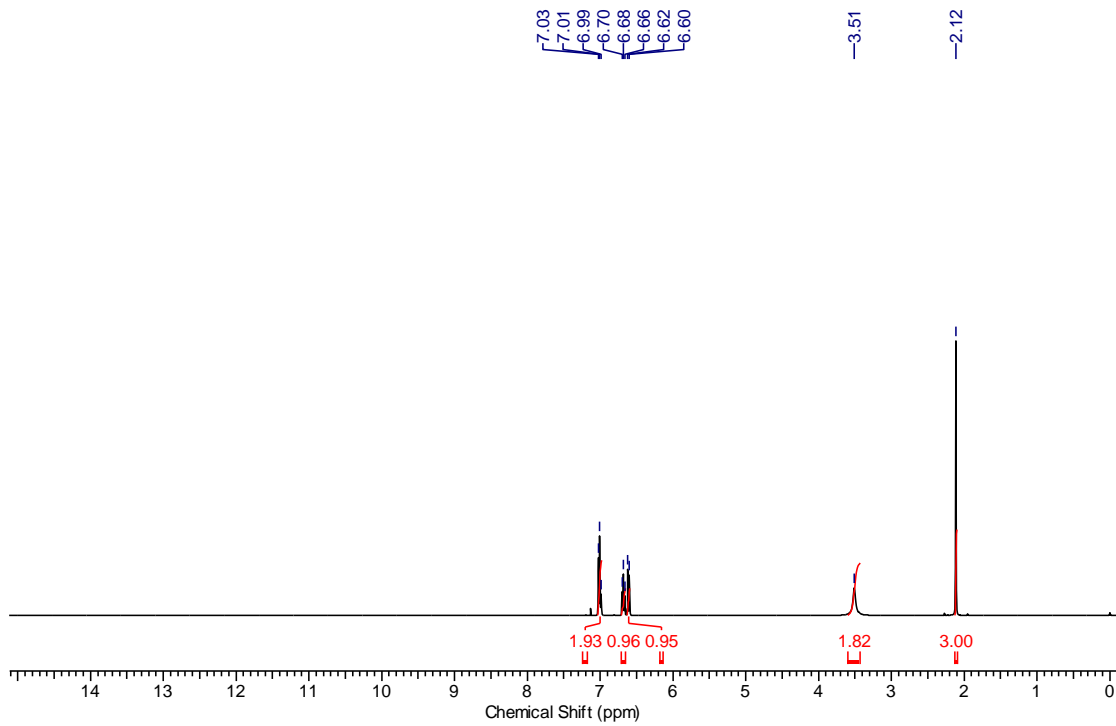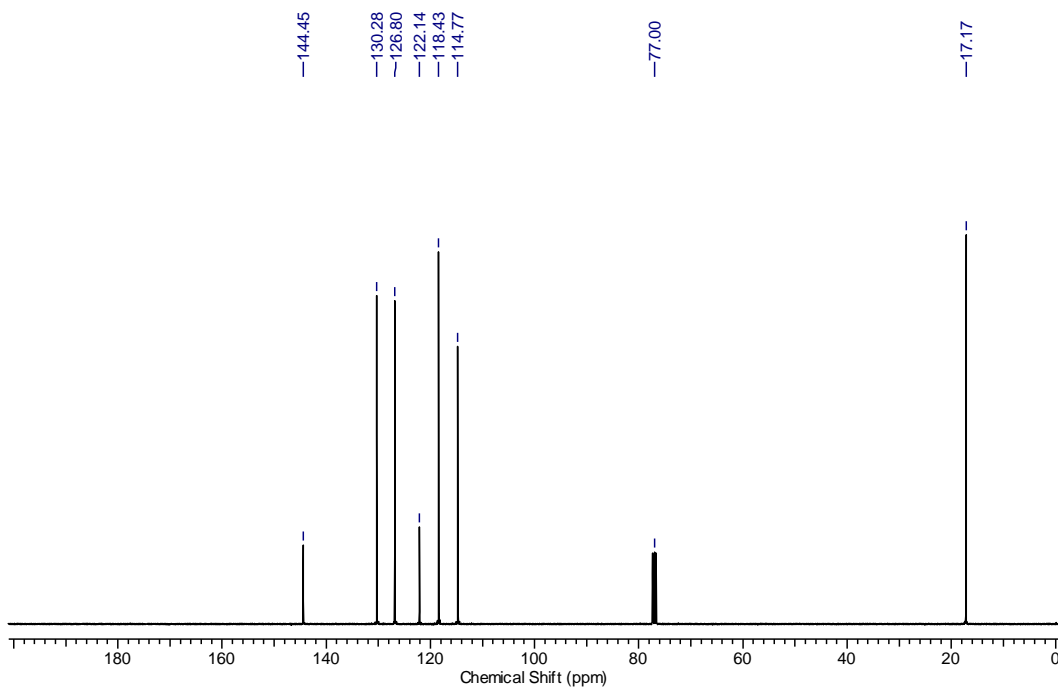

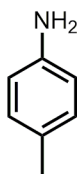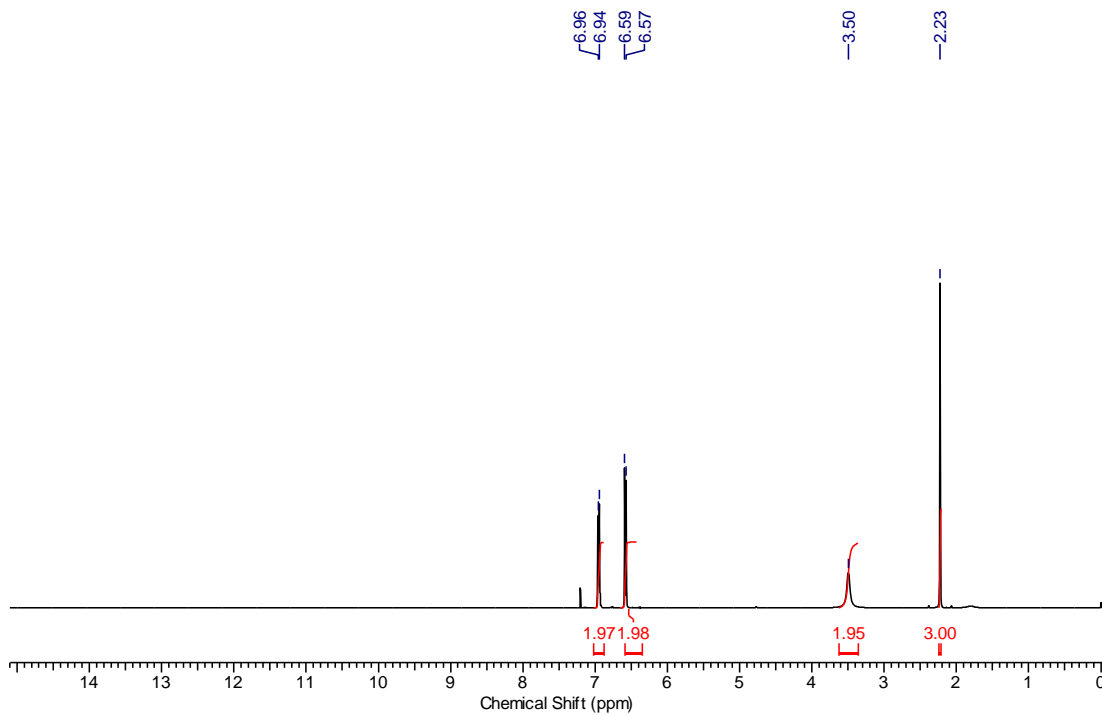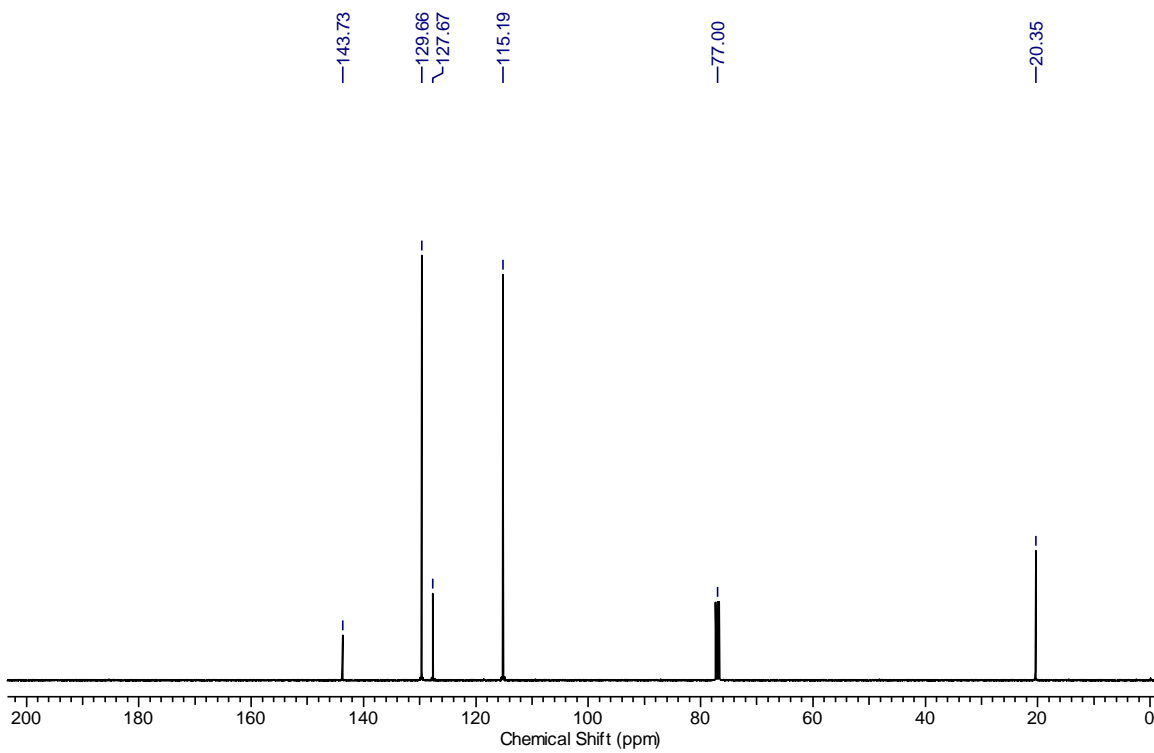

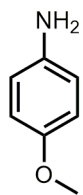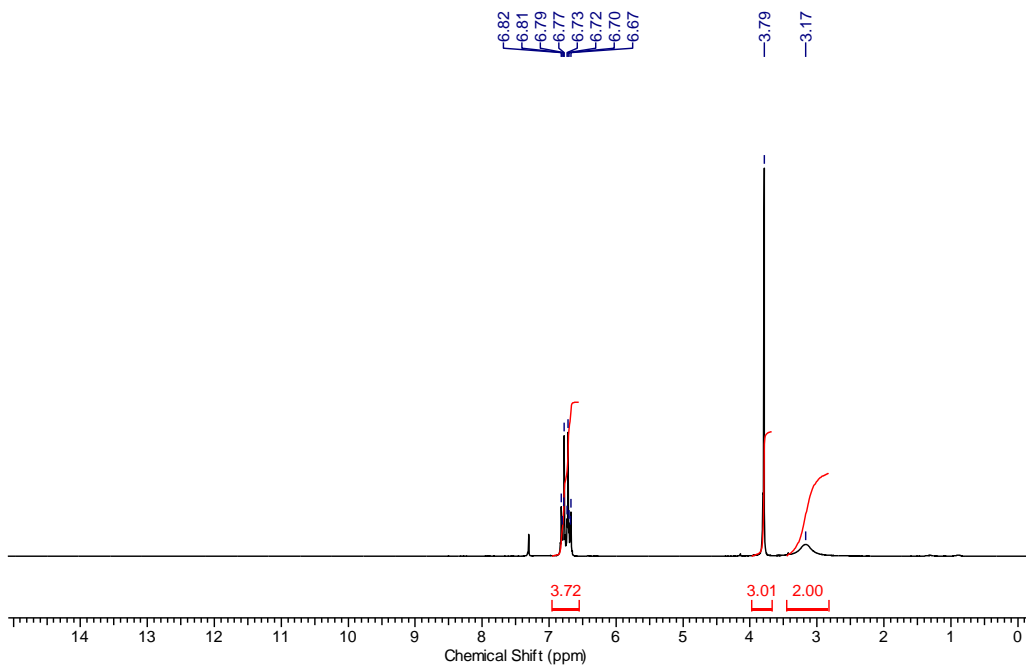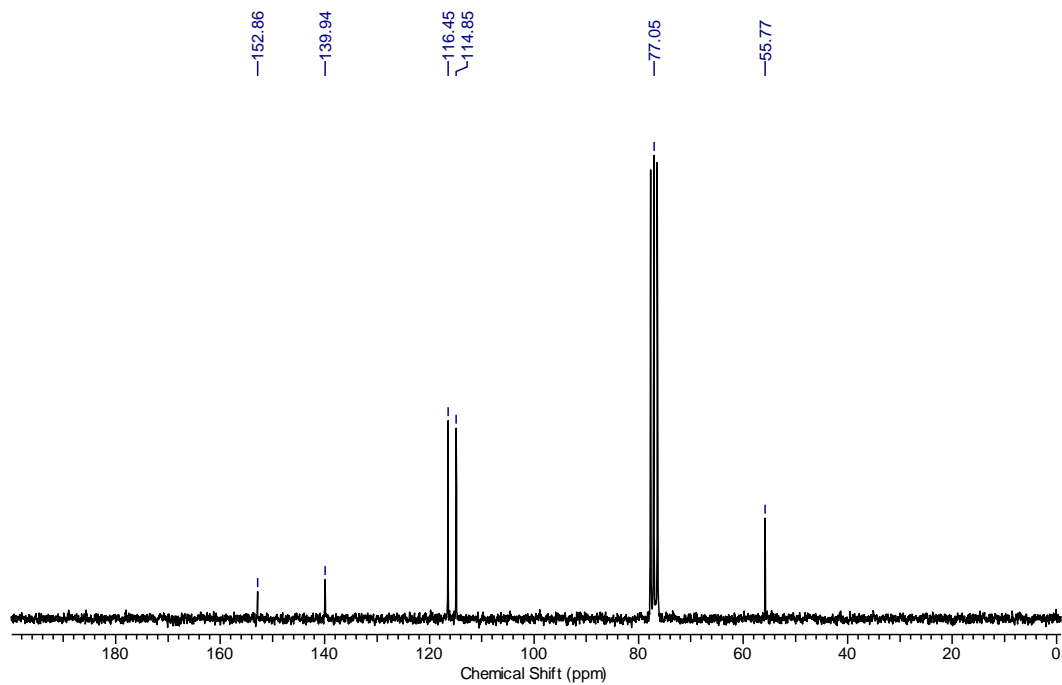

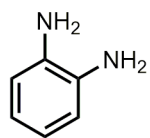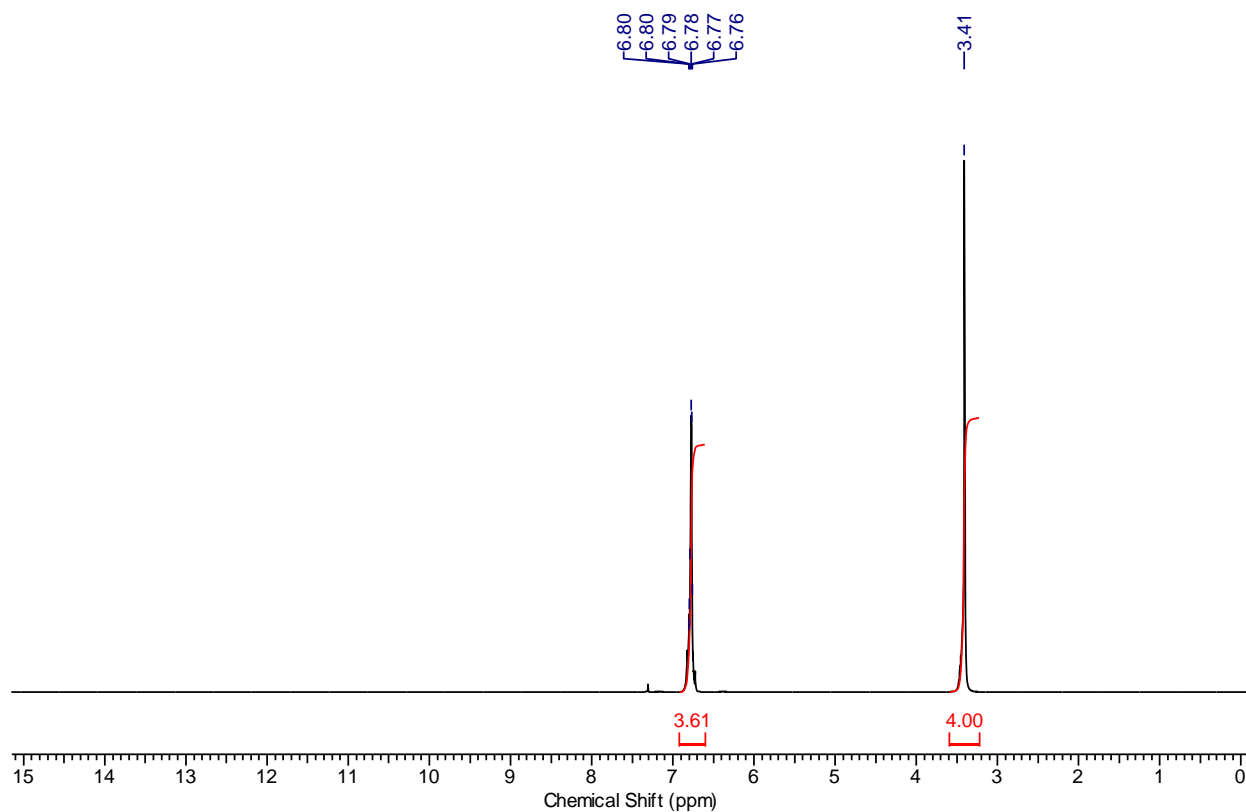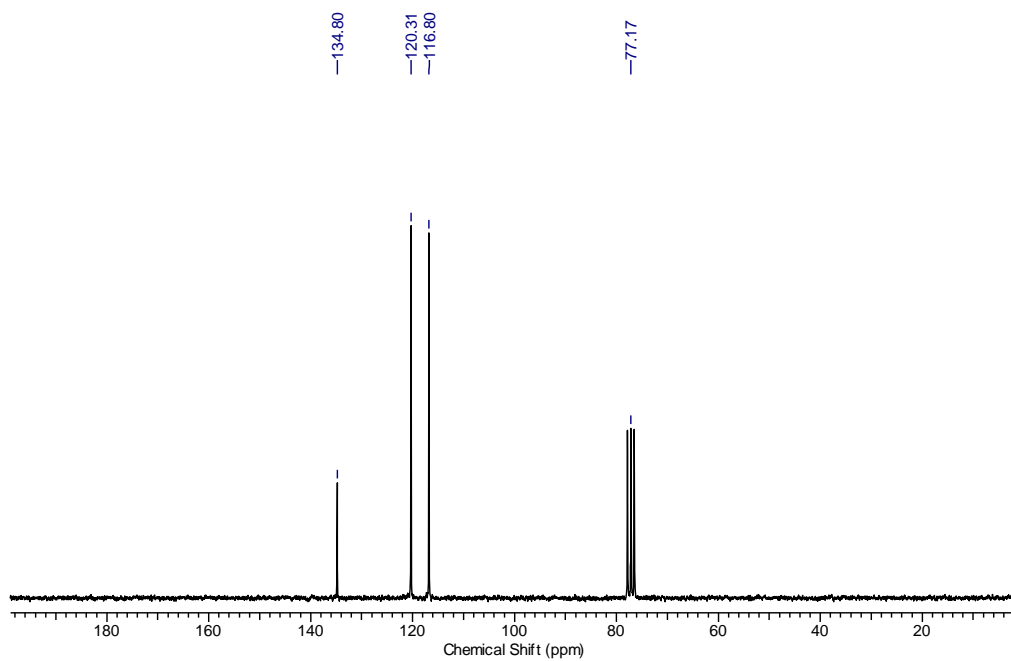

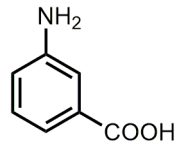

8.01  
8.00  
7.97  
7.96  
7.37  
7.37  
6.75  
6.74  
6.73  
6.70  
6.69

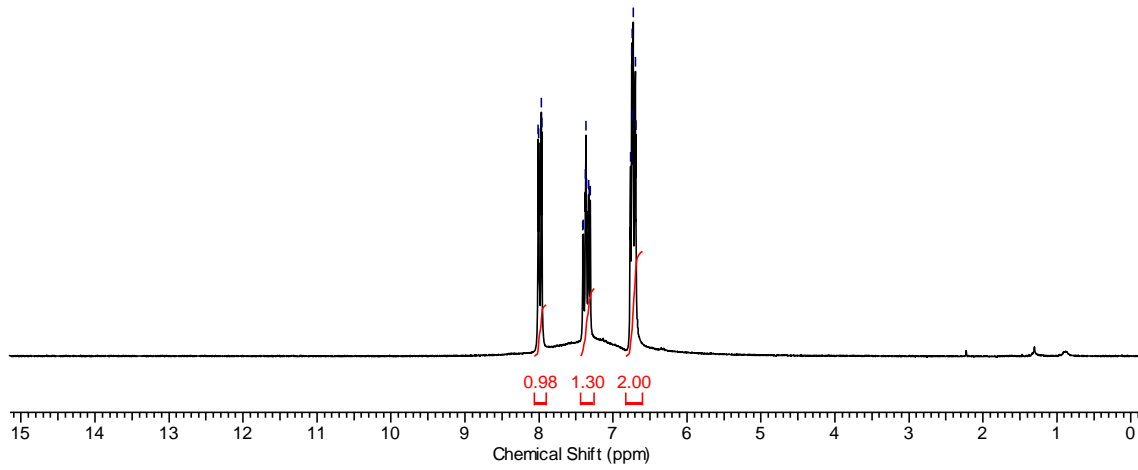

173.62  
151.15  
135.14  
132.17  
116.82  
116.50  
109.59  
77.04

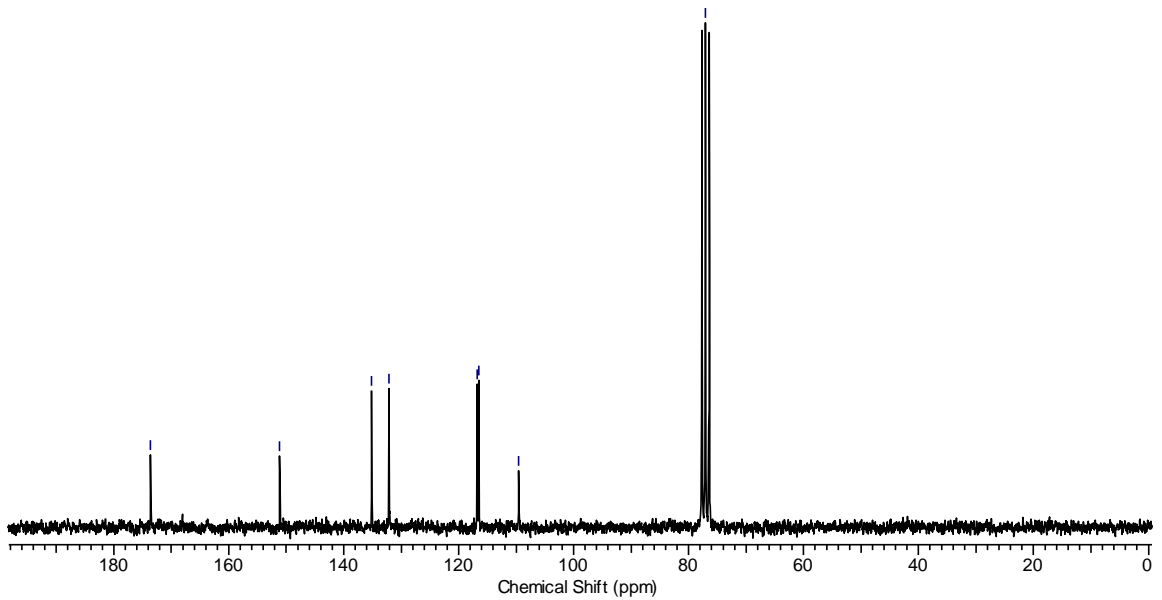

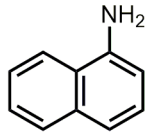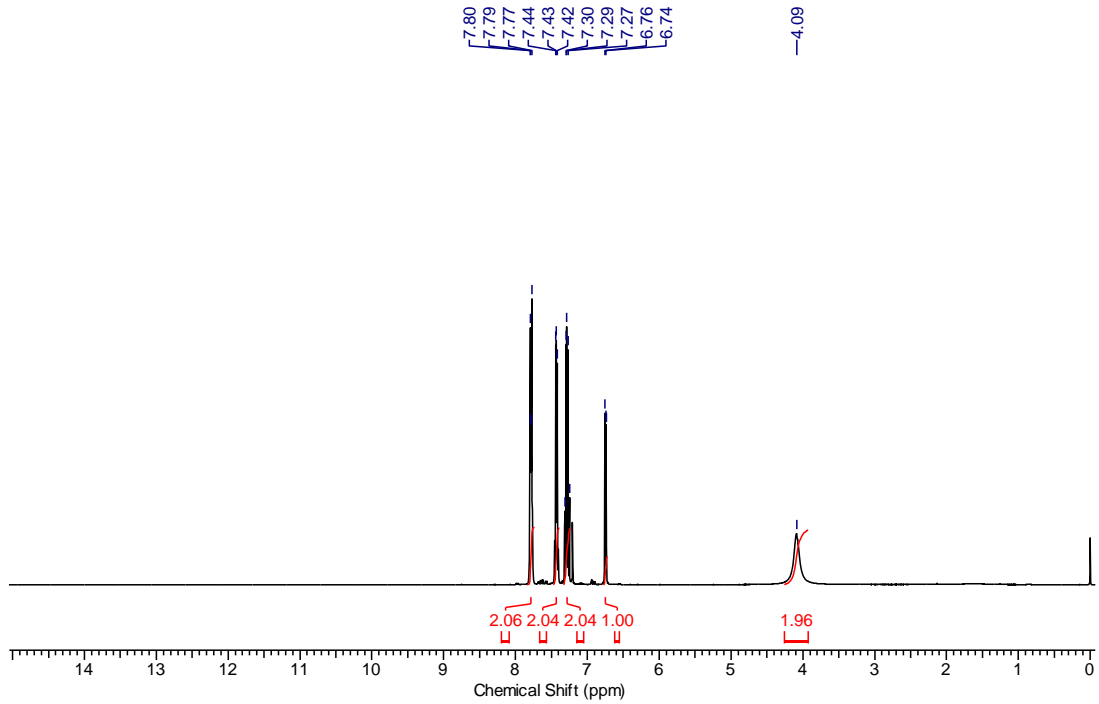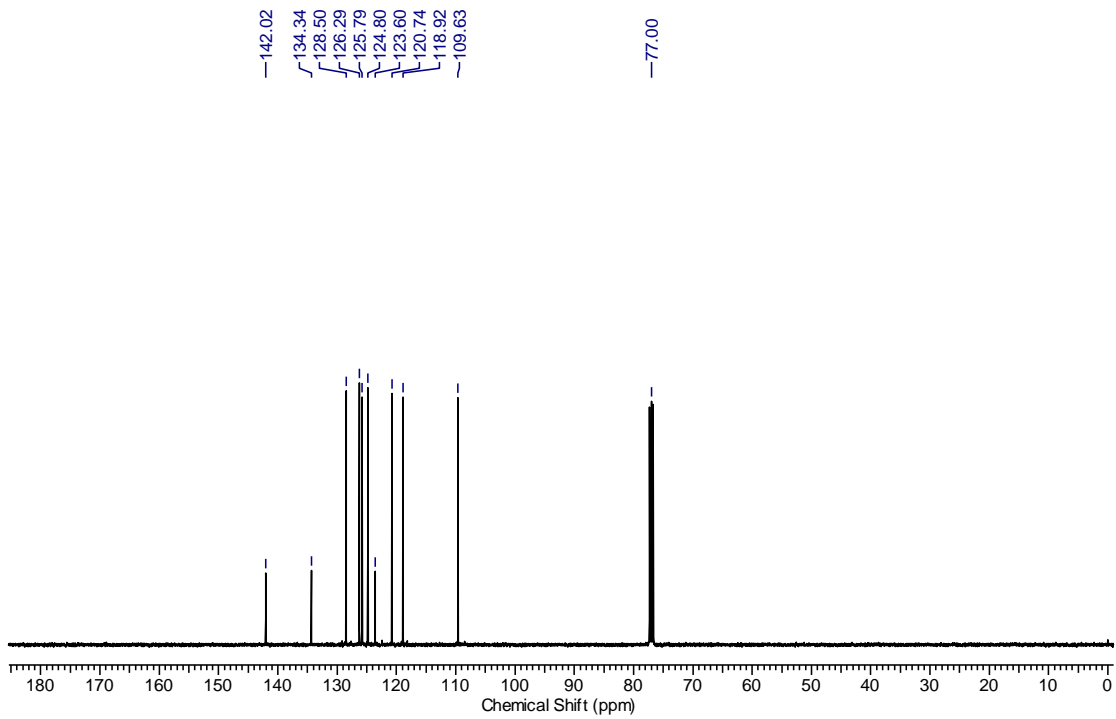

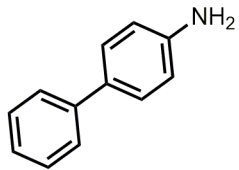

7.85  
7.83  
7.82  
7.82  
7.80  
7.50  
7.48  
7.46  
7.39  
6.75  
6.73

4.03

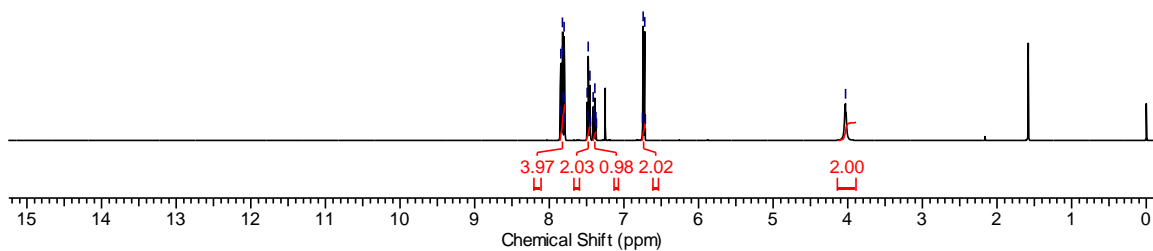

152.94  
149.54  
145.54

128.78  
126.96  
125.08  
122.31

114.61

77.00

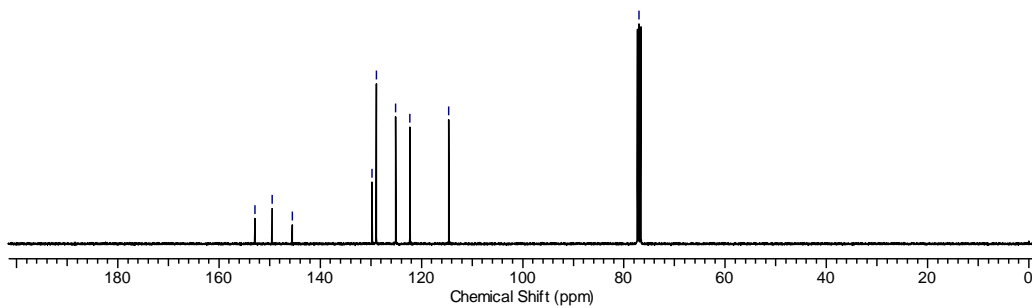

Supplement: c9nj04981a1.pdf [file c9nj04981a1.pdf]
